# Supplementary material for: Palladium-catalyzed enantioselective three-component synthesis of α-arylglycine derivatives from glyoxylic acid, sulfonamides and aryltrifluoroborates
Source: publisher site journal article supplement (doi:10.3762/bjoc.19.52), 2023-05-25
Supplement: Additional file 1 [file 1860-5397-19-52-S1.pdf]

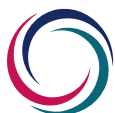

## Supporting Information

for

### **Palladium-catalyzed enantioselective three-component synthesis of $\alpha$ -arylglycine derivatives from glyoxylic acid, sulfonamides and aryltrifluoroborates**

Bastian Jakob, Nico Schneider, Luca Gengenbach and Georg Manolikakes

*Beilstein J. Org. Chem.* **2023**, *19*, 719–726. [doi:10.3762/bjoc.19.52](https://doi.org/10.3762/bjoc.19.52)

## Experimental section and characterization data

## Table of contents

|     |                                           |     |
|-----|-------------------------------------------|-----|
| 1   | General information.....                  | S2  |
| 1.1 | Experimental.....                         | S2  |
| 1.2 | Materials .....                           | S2  |
| 1.3 | Analytical data and instrumentation ..... | S2  |
| 2   | Preparation and analytical data .....     | S4  |
| 2.1 | General procedures (GP) .....             | S4  |
| 2.2 | Synthesis $\alpha$ -arylglycines .....    | S6  |
| 3   | HPLC data .....                           | S16 |
| 4   | NMR data .....                            | S24 |
| 5   | References .....                          | S34 |

## 1 General information

### 1.1 Experimental

Thin layer chromatography (TLC) was performed on precoated aluminum sheets (TLC silica gel 60 F<sub>254</sub>). The spots were visualized by ultraviolet light, iodine or cerium(IV) ammonium molybdate. Flash column chromatography was performed using a puriflash XS 420+ flash purifier machine from Interchim with prepacked flash columns (Puriflash\_Silica HP\_15  $\mu\text{m}$ \_F0040, Puriflash PF C18HP 30  $\mu\text{m}$  F0012) and the respective solvent mixture. All yields refer to the isolated yields of compounds estimated to be > 95% pure as determined by <sup>1</sup>H NMR spectroscopy.

### 1.2 Materials

Unless noted, all starting materials were purchased from different commercial sources and used without further purification. Sulfonamide **10** and ligand **L1** were synthesized according to known literature procedures.<sup>1,2</sup> Racemic products for chiral HPLC analysis were prepared according to the same typical procedures reported for the enantioselective three-component reactions by utilizing the corresponding sulfonamide (0.5 mmol), glyoxylic acid (0.65 mmol) and arylboronic acids (1.0 mmol) in nitromethane (2.0 mL) at 60 °C for 24 h.

### 1.3 Analytical data and instrumentation

**NMR spectroscopy** - Proton nuclear magnetic resonance spectra (<sup>1</sup>H NMR) and carbon spectra (<sup>13</sup>C NMR) were recorded at a frequency of 400 MHz (<sup>1</sup>H) and 101 MHz (<sup>13</sup>C), respectively. Chemical shifts are expressed as parts of million downfield shift on the  $\delta$ -scale and are referenced to the solvent peak (chloroform-*d*<sub>1</sub>:  $\delta$  = 7.26 ppm for <sup>1</sup>H,  $\delta$  = 77.16 ppm for <sup>13</sup>C; DMSO-*d*<sub>6</sub>:  $\delta$  = 2.50 ppm for <sup>1</sup>H,  $\delta$  = 39.52 ppm for <sup>13</sup>C). <sup>19</sup>F NMR spectra were recorded proton decoupled at a frequency of 282 MHz. Chemical shifts are quoted in parts per million and are not referenced. Coupling constants (*J*) are quoted in Hz and the observed signal multiplicities are reported as follows: s = singlet, d = doublet, t = triplet, q = quartet, m = multiplet.

**Mass spectrometry** - Mass spectra (MS) were measured using ESI (electrospray ionization) techniques. High resolution mass spectra (HRMS) were acquired on a Waters GCT Premium using electron ionization mass spectroscopy (EI-MS-TOF).

**Infrared spectroscopy** - Infrared spectra (IR) were recorded on an FTIR (Fourier transform infrared spectroscopy) spectrometer including a diamond universal ATR sampling technique (attenuated total reflectance) from 4000–400  $\text{cm}^{-1}$ . The absorption bands were reported in wave numbers ( $\text{cm}^{-1}$ ).

**Optical rotations** - Rotation values ( $\alpha$ ) were measured with an analog-type 243B polarimeter from *Perkin Elmer*, equipped with a sodium lamp source (589 nm), at 20 °C in a 10 cm cell and the indicated solvent. The specific rotation values are reported as  $[\alpha]_{\lambda}^T$  (mass concentration ( $c$ ) in g·100 mL<sup>-1</sup>, solvent) and are quoted in deg·mL·dm<sup>-1</sup>·g<sup>-1</sup>.

**Analytical chiral HPLC** – Enantiomeric ratios (er) and accordingly enantiomeric excesses (ee) were determined by normal phase high performance liquid chromatographic (HPLC) analysis with a *Hewlett Packard*<sup>TM</sup> system (G1322A degasser, G1311 quadruple pump, G1316A diode array detector with visualization at 254 nm) and the use of a Chiralpak<sup>®</sup> IA, Chiralcel<sup>®</sup> OD-H or OJ-H as chiral column (4.6 mm × 25 cm) obtained from *Daicel Chemical Industries, Ltd.* Elution conditions are reported at specific compounds.

**Melting points** - Melting points are uncorrected.

## 2 Preparation and analytical data

### 2.1 General procedures (GP)

**GP1 (initial experiments)** – In a manner similar to [4] a 10 mL screw cap glass vial was charged with a magnetic stirring bar, sulfonamide **10** (134.7 mg, 0.50 mmol, 1.0 equiv), glyoxylic acid monohydrate (59.8 mg, 0.65 mmol, 1.3 equiv), potassium (phenyl)trifluoroborate (184.0 mg, 1.00 mmol, 2.0 equiv), Pd(TFA)<sub>2</sub> (16.6 mg, 50 μmol, 0.10 equiv), *S,S'*-iPrBox (**L1**, 16.8 mg, 75.0 μmol, 0.15 equiv) and nitromethane (0.25 M referring to sulfonamide, 2 mL) as solvent. Then, the vial was closed with a teflon lined screw cap and the resulting reaction mixture was stirred at 40 °C for 16 h. After cooling to room temperature, the reaction mixture was diluted with acetone and filtered through a short plug of celite and silica gel. The filter pad was rinsed with additional acetone and the combined filtrates were concentrated under reduced pressure. Purification of the crude residue by flash column chromatography afforded the analytically pure product.

**GP2 (parameter optimization)** – In a manner similar to [4] a 8 mL glass vial with a ground glass joint was charged with a magnetic stirring bar, sulfonamide **10** (134.7 mg, 0.50 mmol, 1.0 equiv), glyoxylic acid monohydrate (59.8 mg, 0.65 mmol, 1.3 equiv), potassium phenyltrifluoroborate (184.0 mg, 1.00 mmol, 2.0 equiv), Pd(TFA)<sub>2</sub> (16.6 mg, 50 μmol, 0.10 equiv), *S,S'*-iPrBox L1 (16.8 mg, 75.0 μmol, 0.15 equiv). The glass vial was closed with a rubber septum, evacuated, and backfilled with nitrogen twice before adding nitromethane (0.25 M referring to sulfonamide, 2 mL) as solvent. The resulting reaction mixture was stirred at 40 °C for 16 h. After cooling to room temperature, the reaction mixture was diluted with acetone and filtered through a short plug of celite and silica gel. The filter pad was rinsed with additional acetone and the combined filtrates were concentrated under reduced pressure. Purification of the crude residue by flash column chromatography afforded the analytically pure product.

**GP3 (BF<sub>3</sub>K salt variation)** – An 8 mL glass vial with a ground glass joint was charged with a magnetic stirring bar, sulfonamide **10** (134.7 mg, 0.50 mmol, 1.0 equiv), glyoxylic acid monohydrate (119.6 mg, 1.30 mmol, 2.6 equiv), potassium aryltrifluoroborate (1.00 mmol, 2.0 equiv), Pd(TFA)<sub>2</sub> (16.6 mg, 50 μmol, 0.10 equiv), *S,S'*-iPrBox L1 (16.8 mg, 75.0 μmol, 0.15 equiv), CaCO<sub>3</sub> (50.1 mg, 0.5 mmol, 1.0 equiv), tartaric acid (150.9 mg, 1.0 mmol, 2.0 equiv) and molecular sieves 4 Å (200 mg). The glass vial was closed with a rubber septum, evacuated and backfilled with nitrogen twice before adding nitromethane (0.25 M referring to sulfonamide, 2 mL) as solvent. The resulting reaction mixture was stirred at 40 °C for 16 h. After cooling to room temperature, the reaction mixture was diluted with

acetone and filtered through a short plug of celite and silica gel. The filter pad was rinsed with additional acetone and the combined filtrates were concentrated under reduced pressure. Purification of the crude residue by flash column chromatography afforded the analytically pure product.

**GP4 (BF<sub>3</sub>K salt synthesis)** – A 100 mL round-bottomed flask was charged with a magnetic stirring bar, boronic acid (8.2 mmol, 1.0 equiv) and 40 mL MeCN. Afterwards an aqueous KF solution (3.3 mL, 10 M, 32.8 mmol, 4.0 equiv) was added and the mixture stirred at room temperature for 15 minutes. Then, tartaric acid solution (33.5 mL, 1 M in THF, 33.6 mmol, 2.05 equiv) was slowly dropped into the reaction mixture and stirred for additional 30 minutes. The reaction mixture was filtered and washed three times with 15 mL MeCN each. The solution was concentrated to 20 mL in vacuo and Et<sub>2</sub>O was added until the product precipitated. The product was filtered again, washed with Et<sub>2</sub>O and dried in an oil pump vacuum.

## 2.2 Synthesis $\alpha$ -arylglycines

(*S*)-2-((2,2,4,6,7-Pentamethyl-2,3-dihydrobenzofuran)-5-sulfonamido)-2-phenylacetic acid (**10a**)

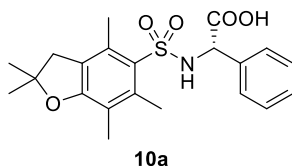

Prepared according to **GP3** from potassium phenyltrifluoroborate (184.0 mg, 1.00 mmol, 2.0 equiv). Purification by reversed phase column chromatography (H<sub>2</sub>O/MeCN + 0.1 vol % TFA = 9:1 → 2:8) and freeze drying afterwards afforded product **10a** as a colorless solid (159 mg, 79%). Analytical data match those reported in the literature. <sup>[4]</sup>

$[\alpha]_D^{20} = +91.8$  (c 0.1, CHCl<sub>3</sub>)

**e.r** = 96:4 [HPLC conditions: Chiralcel ® IA column, *n*-hexane/ethanol/TFA = 9:1:0.1, flow rate = 0.7 mL/min, *t<sub>R</sub>* (minor) = 21.3 min and *t<sub>R</sub>* (major) = 23.1 min].

**R<sub>f</sub>** (*n*-hexane/acetone/AcOH = 2:1:0.1) 0.31

**<sup>1</sup>H NMR** (400 MHz, CDCl<sub>3</sub>)  $\delta$  = 7.26 – 7.13 (m, 5H), 5.63 (d, *J* = 8 Hz, 1H), 4.99 (d, *J* = 4 Hz, 1H), 2.88 (t, *J* = 16 Hz, 2H), 2.46 (s, 3H), 2.38 (s, 3H), 2.02 (s, 3H), 1.45 (s, 6H) ppm.

**<sup>13</sup>C NMR** (101 MHz, CDCl<sub>3</sub>)  $\delta$  = 174.1, 159.85, 139.50, 134.79, 134.12, 128.65, 128.56, 127.73, 127.15, 125.03, 117.99, 86.85, 58.93, 43.04, 28.55, 28.53, 19.28, 17.66, 12.38 ppm.

**MS** (APCI) *m/z* calcd for C<sub>21</sub>H<sub>25</sub>NO<sub>5</sub>S 404.5 [M+H]<sup>+</sup>, found 404.2 [M+H]<sup>+</sup>

**HRMS** (TOF MS EI<sup>+</sup>) *m/z* calcd for C<sub>21</sub>H<sub>25</sub>NO<sub>5</sub>S 403.1453 [M<sup>+</sup>], found 403.1472 [M<sup>+</sup>]

(*S*)-2-(4-Methoxyphenyl)-2-((2,2,4,6,7-pentamethyl-2,3-dihydrobenzofuran)-5-sulfonamido)acetic acid (**10b**)

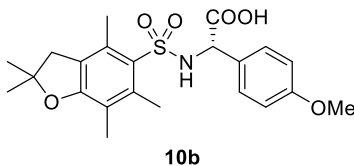

Prepared according to **GP3** from potassium 4-methoxyphenyltrifluoroborate (214.0 mg, 1.00 mmol, 2.0 equiv). Purification by reversed phase column chromatography (H<sub>2</sub>O/MeCN + 0.1 vol % TFA = 9:1 → 2:8) and freeze drying afterwards afforded product **10b** as a colorless solid (121 mg, 55%). Analytical data match those reported in the literature. <sup>[4]</sup>

$[\alpha]_{\text{D}}^{20} = +74.5$  (c 0.1, CHCl<sub>3</sub>)

**e.r** = 88:12 [HPLC conditions: Chiralcel ® IA column, *n*-hexane/ethanol/TFA = 9:1:0.1, flow rate = 0.7 mL/min, *t<sub>R</sub>* (minor) = 25.2 min and *t<sub>R</sub>* (major) = 29.4 min].

**R<sub>f</sub>** (*n*-hexane/acetone/AcOH = 2:1:0.1) 0.31

**<sup>1</sup>H NMR** (400 MHz, CDCl<sub>3</sub>) δ = 7.05 (d, *J* = 8 Hz, 2H), 6.71 (d, *J* = 8 Hz, 2H), 5.60 (d, *J* = 4 Hz, 1H), 4.93 (d, 1H, *J* = 8 Hz), 3.74 (s, 3H), 2.88 (s, 2H), 2.45 (s, 3H), 2.38 (s, 3H), 2.01 (s, 3H), 1.45 (s, 6H) ppm.

**<sup>13</sup>C NMR** (101 MHz, CDCl<sub>3</sub>) δ = 174.50, 159.79, 159.77, 139.42, 134.07, 128.39, 127.91, 126.81, 125.02, 117.95, 113.88, 86.84, 58.44, 55.24, 43.06, 28.50, 28.44, 19.29, 17.67, 12.37 ppm.

**MS** (APCI) *m/z* calcd for C<sub>22</sub>H<sub>27</sub>NO<sub>6</sub>S 434.2 [M+H]<sup>+</sup>, found 434.3 [M+H]<sup>+</sup>

**HRMS** (TOF MS EI<sup>+</sup>) *m/z* calcd for C<sub>22</sub>H<sub>27</sub>NO<sub>6</sub>S 433.1559 [M<sup>+</sup>], found 433.1567 [M<sup>+</sup>]



(*S*)-2-(4-Fluorophenyl)-2-((2,2,4,6,7-pentamethyl-2,3-dihydrobenzofuran)-5-sulfonamido)acetic acid  
**(10c)**

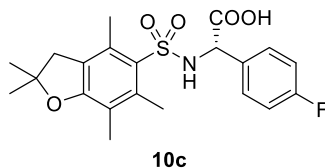

Prepared according to **GP3** from (4-fluorophenyl)boronic acid (139.9 mg, 1.00 mmol, 2.0 equiv). Purification by reversed phase column chromatography (H<sub>2</sub>O/MeCN + 0.1 vol % TFA = 9:1 → 2:8) and freeze drying afterwards afforded product **10c** as a colorless solid (155 mg, 74%). Analytical data match those reported in the literature. <sup>[4]</sup>

$[\alpha]_D^{20} = +78.3$  (c 0.1, CHCl<sub>3</sub>)

**e.r** = 88:12 [HPLC conditions: Chiralcel ® IA column, *n*-hexane/ethanol/TFA = 9:1:0.1, flow rate = 0.7 mL/min, *t<sub>R</sub>* (minor) = 18.9 min and *t<sub>R</sub>* (major) = 22.6 min].

**R<sub>f</sub>** (*n*-hexane/acetone/AcOH = 2:1:0.1) 0.34

**<sup>1</sup>H NMR** (400 MHz, CDCl<sub>3</sub>) δ = 7.13 (dd, *J* = 8 Hz, 2H), 6.88 (t, *J* = 8 Hz, 2H), 5.68 (d, *J* = 8 Hz, 1H), 5.00 (d, 1H, *J* = 4 Hz), 2.88 (s, 2H), 2.47 (s, 3H), 2.35 (s, 3H), 2.03 (s, 3H), 1.46 (d, *J* = 4 Hz, 6H) ppm.

**<sup>13</sup>C NMR** (101 MHz, CDCl<sub>3</sub>) δ = 173.79, 162.72 (d, *J* = 247.5 Hz), 159.92, 139.42, 134.08, 130.68 (d, *J* = 3.0 Hz), 129.04 (d, *J* = 8.1 Hz), 127.71, 125.07, 118.06, 115.45 (d, *J* = 21.2 Hz), 86.93, 58.27, 43.03, 28.52, 28.46, 19.26, 17.67, 12.39 ppm.

**<sup>19</sup>F NMR** (376 MHz, CDCl<sub>3</sub>) δ = -112.59 ppm.

**MS** (APCI) *m/z* calcd for C<sub>21</sub>H<sub>24</sub>FNO<sub>5</sub>S 422.2 [M+H]<sup>+</sup>, found 422.3 [M+H]<sup>+</sup>

**HRMS** (TOF MS EI<sup>+</sup>) *m/z* calcd for C<sub>21</sub>H<sub>24</sub>FNO<sub>5</sub>S 421.1359 [M<sup>+</sup>], found 421.1358 [M<sup>+</sup>]

(*S*)-2-(4-Chlorophenyl)-2-((2,2,4,6,7-pentamethyl-2,3-dihydrobenzofuran)-5-sulfonamido)acetic acid (**10d**)

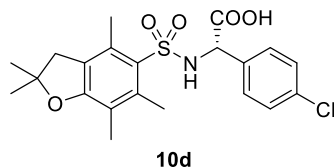

Prepared according to **GP3** from (4-chlorophenyl)boronic acid (156.4 mg, 1.00 mmol, 2.0 equiv). Purification by reversed phase column chromatography (H<sub>2</sub>O/MeCN + 0.1 vol % TFA = 9:1 → 2:8) and freeze drying afterwards afforded product **10d** as a colorless solid (145 mg, 66%). Analytical data match those reported in the literature. <sup>[4]</sup>

$[\alpha]_D^{20} = +81.7$  (c 0.1, CHCl<sub>3</sub>)

**e.r** = 87:13 [HPLC conditions: Chiralcel ® IA column, *n*-hexane/ethanol/TFA = 9:1:0.1, flow rate = 0.7 mL/min, *t<sub>R</sub>* (minor) = 19.4 min and *t<sub>R</sub>* (major) = 23.8 min].

**R<sub>f</sub>** (*n*-hexane/acetone/AcOH = 2:1:0.1) 0.36

**<sup>1</sup>H NMR** (400 MHz, CDCl<sub>3</sub>) δ = 7.16 (d, *J* = 8 Hz, 2H), 7.08 (d, *J* = 8 Hz, 2H), 5.77 (d, *J* = 8 Hz, 1H), 4.99 (d, *J* = 8 Hz, 1H), 2.88 (s, 2H), 2.45 (s, 3H), 2.34 (s, 3H), 2.03 (s, 3H), 1.46 (d, *J* = 8 Hz, 6H) ppm.

**<sup>13</sup>C NMR** (101 MHz, CDCl<sub>3</sub>) δ = 173.78, 159.98, 139.43, 134.65, 134.08, 133.33, 128.60, 127.60, 125.11, 118.10, 86.98, 58.40, 43.01, 28.51, 28.47, 19.25, 17.67, 12.38 ppm.

**MS** (APCI) *m/z* calcd for C<sub>21</sub>H<sub>24</sub>ClNO<sub>5</sub>S 438.1 [M+H]<sup>+</sup>, found 438.3 [M+H]<sup>+</sup>

**HRMS** (TOF MS EI<sup>+</sup>) *m/z* calcd for C<sub>21</sub>H<sub>24</sub>ClNO<sub>5</sub>S [<sup>35</sup>Cl] 437.1064 [M<sup>+</sup>], found 437.1062 [M<sup>+</sup>]; [<sup>37</sup>Cl] 439.1034 [M<sup>+</sup>], found 439.1053 [M<sup>+</sup>]

(*S*)-2-((2,2,4,6,7-Pentamethyl-2,3-dihydrobenzofuran)-5-sulfonamido)-2-(*p*-tolyl)acetic acid (**10e**)

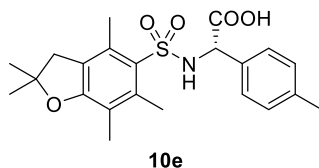

Prepared according to **GP3** from potassium *p*-tolyltrifluoroborate (136.0 mg, 1.00 mmol, 2.0 equiv). Purification by reversed phase column chromatography (H<sub>2</sub>O/MeCN + 0.1 vol % TFA = 9:1 → 2:8) and freeze drying afterwards afforded product **10e** as a colorless solid (117 mg, 56%). Analytical data match those reported in the literature. <sup>[4]</sup>

$[\alpha]_D^{20} = +89.8$  (c 0.1, CHCl<sub>3</sub>)

**e.r** = 96:4 [HPLC conditions: Chiralcel ® IA column, *n*-hexane/ethanol/TFA = 9:1:0.1, flow rate = 0.7 mL/min, *t<sub>R</sub>* (minor) = 22.4 min and *t<sub>R</sub>* (major) = 24.8 min].

**R<sub>f</sub>** (*n*-hexane/acetone/AcOH = 2:1:0.1) 0.36

**<sup>1</sup>H NMR** (400 MHz, CDCl<sub>3</sub>) δ = 7.04 – 6.99 (m, 4fH), 5.59 (d, 1H), 4.93 (d, *J* = 4 Hz, 1H), 2.90 (s, 2H), 2.44 (s, 3H), 2.39 (s, 3H), 2.27 (s, 3H) 2.01 (s, 3H), 1.46 (d, *J* = 4 Hz, 6H) ppm.

**<sup>13</sup>C NMR** (101 MHz, CDCl<sub>3</sub>) δ = 174.53, 159.81, 139.50, 138.63, 134.12, 131.84, 129.23, 127.79, 127.01, 125.02, 117.96, 86.81, 58.71, 43.08, 28.49, 21.12, 19.29, 17.67, 12.35 ppm.

**MS** (APCI) *m/z* calcd for C<sub>22</sub>H<sub>27</sub>NO<sub>5</sub>S 418.2 [M+H]<sup>+</sup>, found 418.3 [M+H]<sup>+</sup>

**HRMS** (TOF MS EI<sup>+</sup>) *m/z* calcd for C<sub>22</sub>H<sub>27</sub>NO<sub>5</sub>S 417.1610 [M<sup>+</sup>], found 417.1605 [M<sup>+</sup>]

(*S*)-2-((2,2,4,6,7-Pentamethyl-2,3-dihydrobenzofuran)-5-sulfonamido)-2-(4-(trifluoromethyl)phenyl)acetic acid (**10f**)

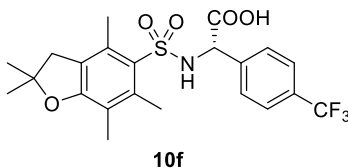

Prepared according to **GP3** from potassium (*p*-trifluoromethylphenyl)trifluoroborate (252.0 mg, 1.00 mmol, 2.0 equiv). Purification by reversed phase column chromatography (H<sub>2</sub>O/MeCN + 0.1 vol % TFA = 9:1 → 2:8) and freeze drying afterwards afforded product **10f** as a colorless solid (32 mg, 14%).

$[\alpha]_D^{20} = +120.4$  (c 0.1, CHCl<sub>3</sub>)

**e.r.** = 99:1 HPLC conditions: Chiralcel ® IA column, *n*-hexane/ethanol/TFA = 9:1:0.1, flow rate = 0.7 mL/min, *t<sub>R</sub>* (minor) = 18.5 min and *t<sub>R</sub>* (major) = 21.3 min].

**R<sub>f</sub>** (*n*-hexane/acetone/AcOH = 2:1:0.1) 0.36

**m.p.** 161-163 °C

**<sup>1</sup>H NMR** (400 MHz, CDCl<sub>3</sub>) δ = 7.42 (d, *J* = 8 Hz, 2H), 7.28 (d, *J* = 8 Hz, 2H), 6.10 (d, *J* = 16 Hz, 1H), 5.06 (d, *J* = 8 Hz, 1H), 2.84 (s, 2H), 2.42 (s, 3H), 2.33 (s, 3H), 1.98 (s, 3H), 1.44 (d, *J* = 4 Hz, 6H) ppm.

**<sup>13</sup>C NMR** (101 MHz, CDCl<sub>3</sub>) δ = 173.30, 160.05, 139.54, 138.95, 134.13, 130.74 (q, *J* = 33.3 Hz), 127.72, 127.25, 125.28 (q, *J* = 3.9 Hz), 125.14, 123.73 (q, *J* = 272.7 Hz), 118.12, 87.00, 58.69, 42.95, 28.43, 28.39, 19.21, 17.63, 12.28 ppm.

**<sup>19</sup>F NMR** (376 MHz, CDCl<sub>3</sub>) δ = -62.67 ppm.

**MS** (APCI) *m/z* calcd for C<sub>22</sub>H<sub>24</sub>F<sub>3</sub>NO<sub>5</sub>S 472.2 [M+H]<sup>+</sup>, found 472.3 [M+H]<sup>+</sup>

**HRMS** (TOF MS EI<sup>+</sup>) *m/z* calcd for C<sub>22</sub>H<sub>24</sub>F<sub>3</sub>NO<sub>5</sub>S 471.1327 [M<sup>+</sup>], found 471.1337 [M<sup>+</sup>]

**IR** (ν in cm<sup>-1</sup>): 3375, 2970, 2929, 1728, 1694, 1577, 1455, 1368, 1142, 1091, 989, 888, 850, 782, 636, 617, 562, 537.

(*S*)-2-(3-Chlorophenyl)-2-((2,2,4,6,7-pentamethyl-2,3-dihydrobenzofuran)-5-sulfonamido)acetic acid  
**(10g)**

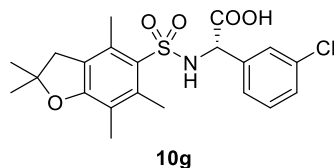

Prepared according to **GP3** from potassium (3-chlorophenyl)trifluoroborate (218.5 mg, 1.00 mmol, 2.0 equiv). Purification by reversed phase column chromatography (H<sub>2</sub>O/MeCN + 0.1 vol % TFA = 9:1 → 2:8) and freeze drying afterwards afforded product **10g** as a colorless solid (28 mg, 13%). Analytical data match those reported in the literature. <sup>[4]</sup>

$[\alpha]_D^{20} = +86.4$  (c 0.1, CHCl<sub>3</sub>)

**e.r** = 97:3 [HPLC conditions: Chiralcel ® IA column, *n*-hexane/ethanol/TFA = 9:1:0.1, flow rate = 0.7 mL/min, *t<sub>R</sub>* (minor) = 18.8 min and *t<sub>R</sub>* (major) = 21.1 min].

**R<sub>f</sub>** (*n*-hexane/acetone/AcOH = 2:1:0.1) 0.42

**<sup>1</sup>H NMR** (400 MHz, CDCl<sub>3</sub>) δ = 7.18 – 7.05 (m, 4H), 5.73 (d, *J* = 8 Hz, 1H), 5.02 (d, 1H, *J* = 4 Hz), 2.87 (q, *J* = 10 Hz, 2H), 2.46 (s, 3H), 2.35 (s, 3H), 2.02 (s, 3H), 1.45 (s, 6H) ppm.

**<sup>13</sup>C NMR** (101 MHz, CDCl<sub>3</sub>) δ = 172.78, 159.92, 139.33, 136.66, 134.39, 133.97, 129.61, 128.65, 127.65, 127.36, 125.55, 125.07, 118.16, 86.88, 58.50, 43.00, 28.60, 28.57, 19.24, 17.66, 12.40 ppm.

**MS** (APCI) *m/z* calcd for C<sub>21</sub>H<sub>24</sub>ClNO<sub>5</sub>S 438.1 [M+H]<sup>+</sup>, found 438.3 [M+H]<sup>+</sup>

**HRMS** (TOF MS EI<sup>+</sup>) *m/z* calcd for C<sub>21</sub>H<sub>24</sub>ClNO<sub>5</sub>S [<sup>37</sup>Cl] 439.1034 [M<sup>+</sup>], found 439.1052 [M<sup>+</sup>]

(*S*)-2-((2,2,4,6,7-Pentamethyl-2,3-dihydrobenzofuran)-5-sulfonamido)-2-(*o*-tolyl)acetic acid (**10h**)

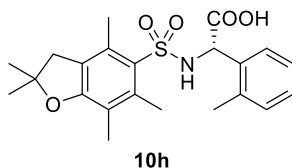

Prepared according to **GP3** from potassium (2-methylphenyl)trifluoroborate (198.0 mg, 1.00 mmol, 2.0 equiv). Purification by reversed phase column chromatography (H<sub>2</sub>O/MeCN + 0.1 vol % TFA = 9:1 → 2:8) and freeze drying afterwards afforded product **10h** as a colorless solid (63 mg, 30%). Analytical data match those reported in the literature. <sup>[4]</sup>

$[\alpha]_D^{20} = +0.0$  (c 0.1, CHCl<sub>3</sub>)

**e.r** = 50:50 [HPLC conditions: Chiralcel ® IA column, *n*-hexane/ethanol/TFA = 9:1:0.1, flow rate = 0.7 mL/min, *t*<sub>R</sub> (minor) = 20.6 min and *t*<sub>R</sub> (major) = 23.4 min].

**R<sub>f</sub>** (*n*-hexane/acetone/AcOH = 2:1:0.1) 0.29

**<sup>1</sup>H NMR** (400 MHz, CDCl<sub>3</sub>) δ = 7.14– 6.98f (m, 4H), 5.60 (d, *J* = 4 Hz, 1H), 5.24 (d, *J* = 4 Hz, 1H), 2.86 (s, 2H), 2.45 (s, 3H), 2.36 (s, 3H), 2.26 (s, 3H), 2.00 (s, 3H), 1.45 (d, *J* = 4 Hz, 6H) ppm.

**<sup>13</sup>C NMR** (101 MHz, CDCl<sub>3</sub>) δ = 174.42, 159.76, 139.53, 136.37, 134.07, 133.39, 130.72, 128.54, 127.80, 126.91, 126.11, 124.99, 117.95, 86.81, 55.52, 43.02, 28.50, 19.20, 19.07, 17.65, 12.35 ppm.

**MS** (APCI) *m/z* calcd for C<sub>22</sub>H<sub>27</sub>NO<sub>5</sub>S 418.2 [M+H]<sup>+</sup>, found 418.3 [M+H]<sup>+</sup>

**HRMS** (TOF MS EI<sup>+</sup>) *m/z* calcd for C<sub>22</sub>H<sub>27</sub>NO<sub>5</sub>S 417.1610 [M<sup>+</sup>], found 417.1622 [M<sup>+</sup>]

(*S*)-2-(4-(Benzyloxy)phenyl)-2-((2,2,4,7-tetramethyl-2,3-dihydrobenzofuran)-5-sulfonamido)acetic acid (**10k**)

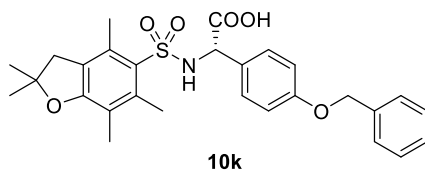

Prepared according to **GP3** from potassium (4-benzyloxyphenyl)trifluoro borate (290.1 mg, 1.00 mmol, 2.0 equiv). Purification by reversed phase column chromatography (H<sub>2</sub>O/MeCN + 0.1 vol % TFA = 9:1 → 2:8) and freeze drying afterwards afforded product **10k** as a colorless solid (96 mg, 38%).

$[\alpha]_D^{20} = +64.0$  (c 0.1, CHCl<sub>3</sub>)

**e.r.** = 88:12 [HPLC conditions: Chiralcel ® IA column, *n*-hexane/ethanol/TFA = 9:1:0.1, flow rate = 0.7 mL/min, *t<sub>R</sub>* (minor) = 28.3 min and *t<sub>R</sub>* (major) = 29.7 min].

**R<sub>f</sub>** (*n*-Hexan/Aceton/AcOH = 2:1:0.1) 0.31

**m.p.** 158-161 °C

**<sup>1</sup>H NMR** (400 MHz, CDCl<sub>3</sub>) δ = 7.39-7.33 (m, 5H), 7.06 (d, *J* = 8 Hz, 2H), 6.79 (d, *J* = 8 Hz, 2H), 5.60 (d, *J* = 4 Hz, 1H), 4.98 (d, *J* = 8 Hz, 2H), 2.90 (s, 2H), 2.45 (s, 3H), 2.39 (s, 3H), 2.02 (s, 3H), 1.45 (s, 6H) ppm.

**<sup>13</sup>C NMR** (101 MHz, CDCl<sub>3</sub>) δ = 174.46, 159.81, 159.06, 139.48, 136.57, 134.11, 128.64, 128.44, 127.87, 127.46, 127.13, 125.06, 117.97, 114.77, 86.86, 70.04, 58.43, 43.08, 28.51, 19.30, 17.68, 12.41 ppm.

**MS** (APCI) *m/z* calcd for C<sub>28</sub>H<sub>31</sub>NO<sub>6</sub>S 510.6 [M+H]<sup>+</sup>, found 510.4 [M+H]<sup>+</sup>

**HRMS** (TOF MS EI<sup>+</sup>) *m/z* calcd for C<sub>28</sub>H<sub>31</sub>NO<sub>6</sub>S 509.1872 [M<sup>+</sup>], found 509.1883 [M<sup>+</sup>]

**IR** (ν in cm<sup>-1</sup>): 2970, 1738, 1575, 1511, 1371, 1304, 1231, 1218, 1136, 1088, 780, 732, 638, 615, 529.

(*R*)-2-(4-(Benzyloxy)phenyl)-2-((2,2,4,7-tetramethyl-2,3-dihydrobenzofuran)-5-sulfonamido)acetic acid (**101**)

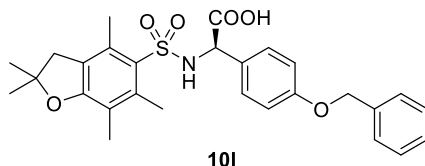

Prepared according to **GP3** from potassium (4-benzyloxyphenyl)trifluoroborate (290.1 mg, 1.00 mmol, 2.0 equiv). Purification by reversed phase column chromatography (H<sub>2</sub>O/MeCN + 0.1 vol % TFA = 9:1 → 2:8) and freeze drying afterwards afforded product **101** as a colorless solid (67 mg, 26%).

$[\alpha]_D^{20} = -74.0$  (c 0.1, CHCl<sub>3</sub>)

**e.r.** = 87:13 [HPLC conditions: Chiralcel ® IA column, *n*-hexane/ethanol/TFA = 9:1:0.1, flow rate = 0.7 mL/min,  $t_R$  (minor) = 39.0 min and  $t_R$  (major) = 36.2 min].

**R<sub>f</sub>** (*n*-Hexan/Aceton/AcOH = 2:1:0.1) 0.31

**m.p.** 159-162 °C

**<sup>1</sup>H NMR** (400 MHz, CDCl<sub>3</sub>)  $\delta$  = 7.05 (d,  $J$  = 8 Hz, 2H), 6.71 (d,  $J$  = 8 Hz, 2H), 5.62 (d,  $J$  = 4 Hz, 1H), 4.93 (d, 1H,  $J$  = 8 Hz), 3.74 (s, 3H), 2.88 (s, 2H), 2.45 (s, 3H), 2.37 (s, 3H), 2.01 (s, 3H), 1.45 (s, 6H) ppm.

**MS** (APCI)  $m/z$  calcd for C<sub>28</sub>H<sub>31</sub>NO<sub>6</sub>S 510.6 [M+H]<sup>+</sup>, found 510.4 [M+H]<sup>+</sup>

**HRMS** (TOF MS EI<sup>+</sup>)  $m/z$  calcd for C<sub>28</sub>H<sub>31</sub>NO<sub>6</sub>S 509.1872 [M<sup>+</sup>], found 509.1887 [M<sup>+</sup>]

**IR** ( $\nu$  in cm<sup>-1</sup>): 2970, 1738, 1575, 1511, 1371, 1304, 1231, 1218, 1136, 1088, 780, 732, 638, 615, 529.



### 3 HPLC data

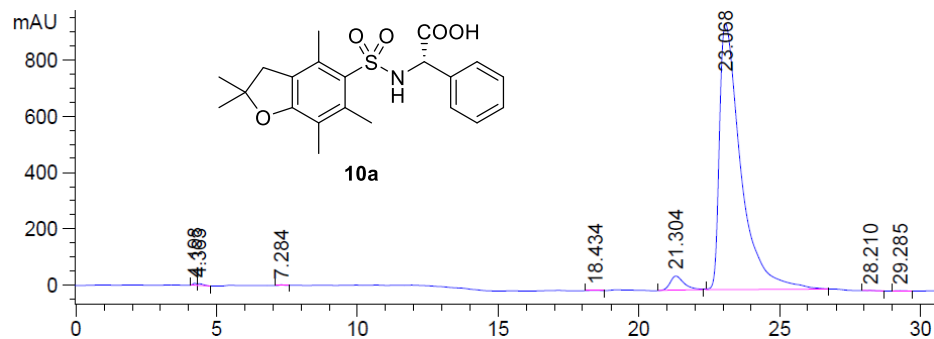

| Peak # | RetTime [min] | Type | Width [min] | Area [mAU*s] | Height [mAU] | Area %  |
|--------|---------------|------|-------------|--------------|--------------|---------|
| 3      | 7.284         | BB   | 0.1635      | 25.78566     | 2.32256      | 0.0490  |
| 4      | 18.434        | BV   | 0.2799      | 33.17374     | 1.54863      | 0.0630  |
| 5      | 21.304        | BB   | 0.5308      | 1845.60498   | 51.40861     | 3.5073  |
| 6      | 23.068        | BB   | 0.7884      | 5.02396e4    | 947.75934    | 95.4717 |
| 7      | 28.210        | BB   | 0.2292      | 23.31352     | 1.27601      | 0.0443  |
| 8      | 29.285        | BB   | 0.2751      | 25.42038     | 1.26126      | 0.0483  |
| 9      | 31.432        | BB   | 0.2938      | 27.37650     | 1.33170      | 0.0520  |
| 10     | 32.604        | BB   | 0.3343      | 37.34045     | 1.68655      | 0.0710  |
| 11     | 33.924        | BB   | 0.3303      | 39.58357     | 1.64728      | 0.0752  |
| 12     | 35.147        | BB   | 0.2903      | 31.96850     | 1.48986      | 0.0608  |
| 13     | 37.327        | BB   | 0.2994      | 27.08632     | 1.30920      | 0.0515  |
| 14     | 38.545        | BB   | 0.3028      | 35.43021     | 1.59707      | 0.0673  |
| 15     | 46.007        | BB   | 0.2718      | 29.43589     | 1.33230      | 0.0559  |
| 16     | 47.168        | BB   | 0.3023      | 29.01262     | 1.36311      | 0.0551  |

Signal 2: DAD1 B, Sig=254,16 Ref=380,100

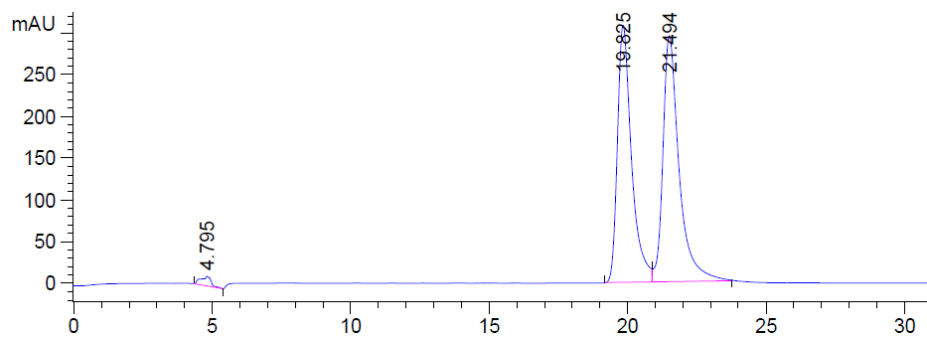

| Peak # | RetTime [min] | Type | Width [min] | Area [mAU*s] | Height [mAU] | Area %  |
|--------|---------------|------|-------------|--------------|--------------|---------|
| 1      | 4.795         | BV   | 0.3316      | 307.34262    | 11.65567     | 1.3259  |
| 2      | 19.825        | BV   | 0.5289      | 1.09077e4    | 308.19196    | 47.0582 |
| 3      | 21.494        | VB   | 0.6017      | 1.19642e4    | 294.68765    | 51.6158 |

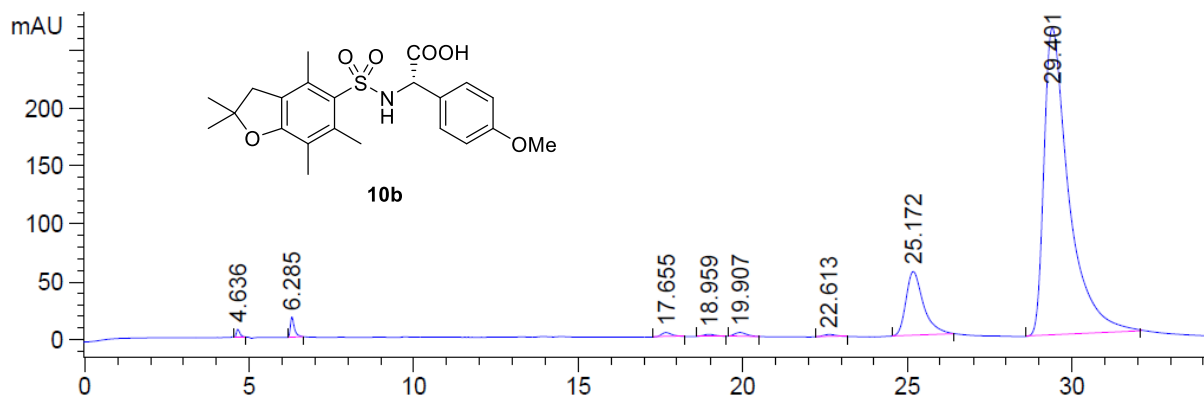

Signal 2: DAD1 B, Sig=254,16 Ref=380,100

| Peak # | RetTime [min] | Type | Width [min] | Area [mAU*s] | Height [mAU] | Area %  |
|--------|---------------|------|-------------|--------------|--------------|---------|
| 3      | 17.655        | BB   | 0.3266      | 87.18548     | 3.73143      | 0.5285  |
| 4      | 18.959        | BB   | 0.3481      | 50.30979     | 1.83377      | 0.3050  |
| 5      | 19.907        | BB   | 0.3805      | 96.15298     | 3.52167      | 0.5828  |
| 6      | 22.613        | BB   | 0.3465      | 54.84767     | 1.93602      | 0.3325  |
| 7      | 25.172        | BB   | 0.5533      | 2058.32520   | 55.16533     | 12.4765 |
| 8      | 29.401        | BB   | 0.7693      | 1.39437e4    | 265.26846    | 84.5197 |

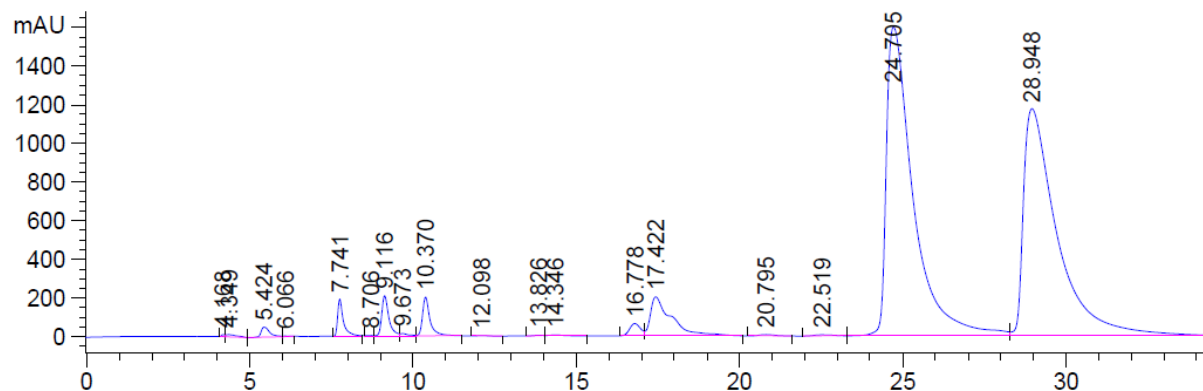

Signal 2: DAD1 B, Sig=254,16 Ref=380,100

| Peak # | RetTime [min] | Type | Width [min] | Area [mAU*s] | Height [mAU] | Area %  |
|--------|---------------|------|-------------|--------------|--------------|---------|
| 1      | 4.168         | BV   | 0.1132      | 82.02338     | 11.23207     | 0.0415  |
| 2      | 4.349         | VV   | 0.3077      | 305.31033    | 12.92062     | 0.1547  |
| 3      | 5.424         | VB   | 0.2885      | 992.92761    | 52.53289     | 0.5030  |
| 4      | 6.066         | BB   | 0.1972      | 55.68750     | 3.75167      | 0.0282  |
| 5      | 7.741         | BB   | 0.1814      | 2395.23901   | 192.18964    | 1.2133  |
| 6      | 8.706         | BV   | 0.2108      | 58.75045     | 3.92189      | 0.0298  |
| 7      | 9.116         | VV   | 0.2266      | 3200.89844   | 209.14458    | 1.6214  |
| 8      | 9.673         | VV   | 0.2479      | 232.84340    | 13.06846     | 0.1179  |
| 9      | 10.370        | VB   | 0.2382      | 3289.87109   | 201.78976    | 1.6665  |
| 10     | 12.098        | BB   | 0.2589      | 46.99249     | 2.60005      | 0.0238  |
| 11     | 13.826        | BV   | 0.3355      | 92.35009     | 3.80041      | 0.0468  |
| 12     | 14.346        | VB   | 0.4744      | 196.36867    | 5.75023      | 0.0995  |
| 13     | 16.778        | BV   | 0.3580      | 1479.89856   | 63.95156     | 0.7497  |
| 14     | 17.422        | VB   | 0.6206      | 9127.63574   | 202.22566    | 4.6237  |
| 15     | 20.795        | BB   | 0.5354      | 270.13916    | 7.47817      | 0.1368  |
| 16     | 22.519        | BV   | 0.5264      | 277.62607    | 6.32148      | 0.1406  |
| 17     | 24.705        | VV   | 0.8434      | 9.15133e4    | 1599.83997   | 46.3570 |
| 18     | 28.948        | VB   | 1.0315      | 8.37920e4    | 1175.74207   | 42.4457 |

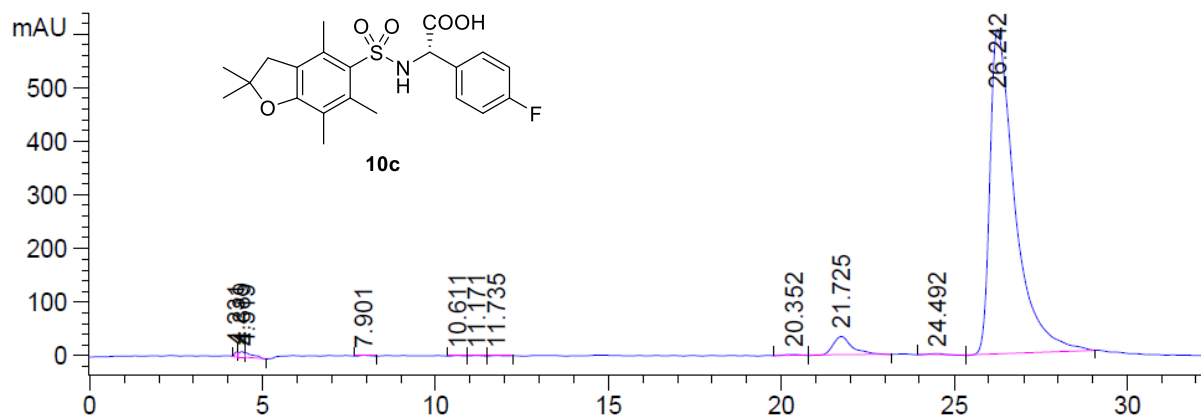

Signal 2: DAD1 B, Sig=254,16 Ref=380,100

| Peak # | RetTime [min] | Type | Width [min] | Area [mAU*s] | Height [mAU] | Area %  |
|--------|---------------|------|-------------|--------------|--------------|---------|
| 1      | 4.231         | BV   | 0.1172      | 79.68301     | 9.97425      | 0.2451  |
| 2      | 4.389         | VV   | 0.1425      | 111.25517    | 11.14017     | 0.3422  |
| 3      | 4.519         | VV   | 0.2307      | 172.14340    | 9.44154      | 0.5294  |
| 4      | 7.901         | BV   | 0.2327      | 25.82013     | 1.61337      | 0.0794  |
| 5      | 10.611        | BV   | 0.2170      | 19.46048     | 1.16426      | 0.0599  |
| 6      | 11.171        | VV   | 0.2349      | 19.71332     | 1.04123      | 0.0606  |
| 7      | 11.735        | VB   | 0.2481      | 20.39672     | 1.02523      | 0.0627  |
| 8      | 20.352        | BV   | 0.4181      | 74.25783     | 2.17641      | 0.2284  |
| 9      | 21.725        | VB   | 0.5779      | 1354.17615   | 34.80343     | 4.1648  |
| 10     | 24.492        | BV   | 0.4176      | 98.18373     | 2.78273      | 0.3020  |
| 11     | 26.242        | VB   | 0.7664      | 3.05395e4    | 607.59558    | 93.9255 |

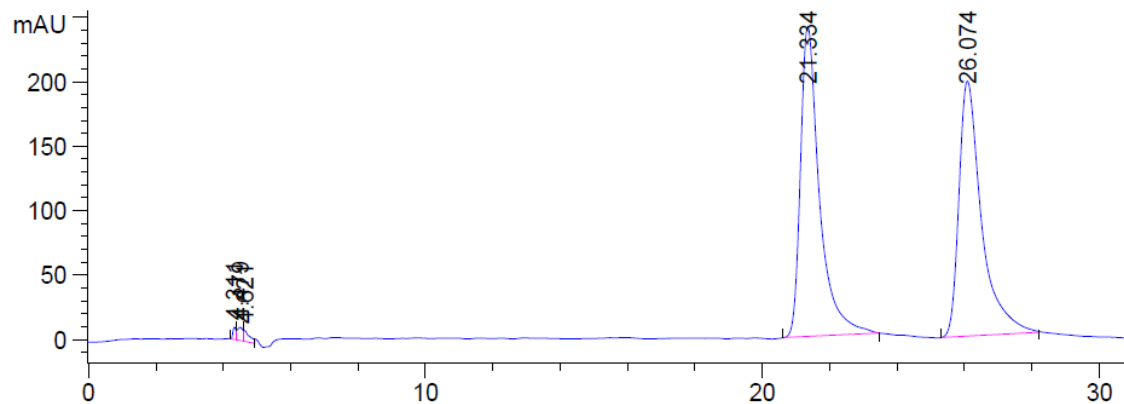

Signal 2: DAD1 B, Sig=254,16 Ref=380,100

| Peak # | RetTime [min] | Type | Width [min] | Area [mAU*s] | Height [mAU] | Area %  |
|--------|---------------|------|-------------|--------------|--------------|---------|
| 1      | 4.311         | BV   | 0.1077      | 69.33904     | 9.89981      | 0.3646  |
| 2      | 4.479         | VV   | 0.1678      | 119.82873    | 10.60920     | 0.6301  |
| 3      | 4.621         | VB   | 0.1634      | 107.53255    | 8.74918      | 0.5654  |
| 4      | 21.334        | BB   | 0.5805      | 9498.18066   | 240.64174    | 49.9418 |
| 5      | 26.074        | BB   | 0.6964      | 9223.63574   | 197.66888    | 48.4982 |

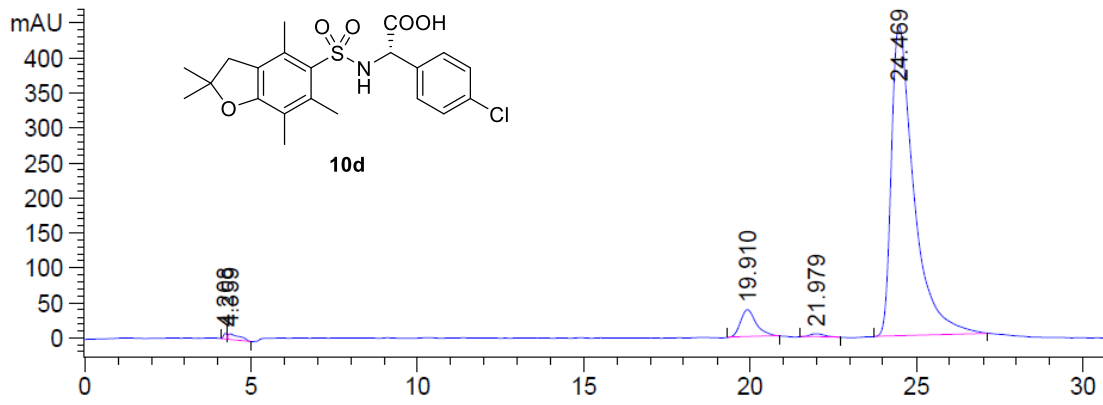

Signal 2: DAD1 B, Sig=254,16 Ref=380,100

| Peak # | RetTime [min] | Type | Width [min] | Area [mAU*s] | Height [mAU] | Area %  |
|--------|---------------|------|-------------|--------------|--------------|---------|
| 1      | 4.208         | BV   | 0.1227      | 62.44593     | 7.85594      | 0.2750  |
| 2      | 4.359         | VV   | 0.3127      | 203.58652    | 8.05958      | 0.8965  |
| 3      | 19.910        | BB   | 0.5085      | 1320.59668   | 39.25277     | 5.8151  |
| 4      | 21.979        | BB   | 0.4526      | 163.75943    | 4.86591      | 0.7211  |
| 5      | 24.469        | BB   | 0.6823      | 2.09594e4    | 444.35391    | 92.2924 |

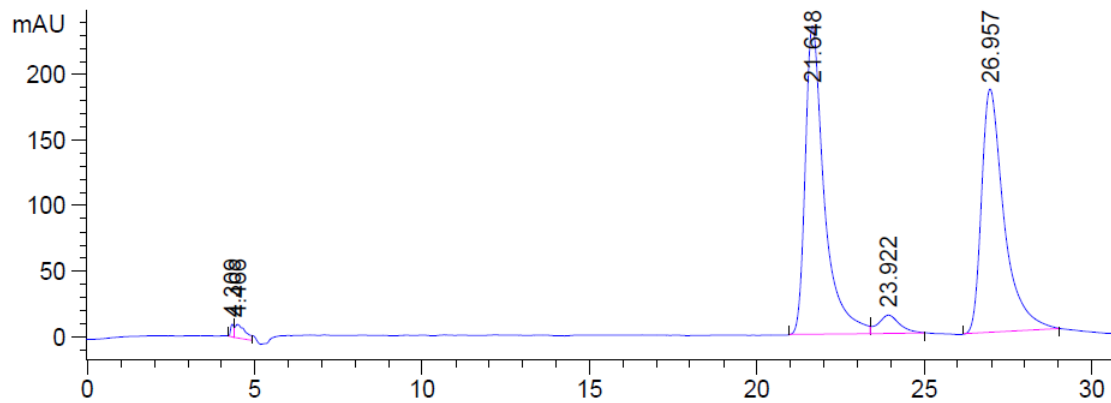

Signal 2: DAD1 B, Sig=254,16 Ref=380,100

| Peak # | RetTime [min] | Type | Width [min] | Area [mAU*s] | Height [mAU] | Area %  |
|--------|---------------|------|-------------|--------------|--------------|---------|
| 1      | 4.309         | BV   | 0.1083      | 68.42589     | 9.70096      | 0.3593  |
| 2      | 4.466         | VB   | 0.2637      | 215.05797    | 10.29743     | 1.1294  |
| 3      | 21.648        | BB   | 0.5898      | 9361.87988   | 235.47879    | 49.1641 |
| 4      | 23.922        | BB   | 0.6231      | 633.47345    | 14.07428     | 3.3267  |
| 5      | 26.957        | BB   | 0.7057      | 8763.26855   | 186.00394    | 46.0205 |

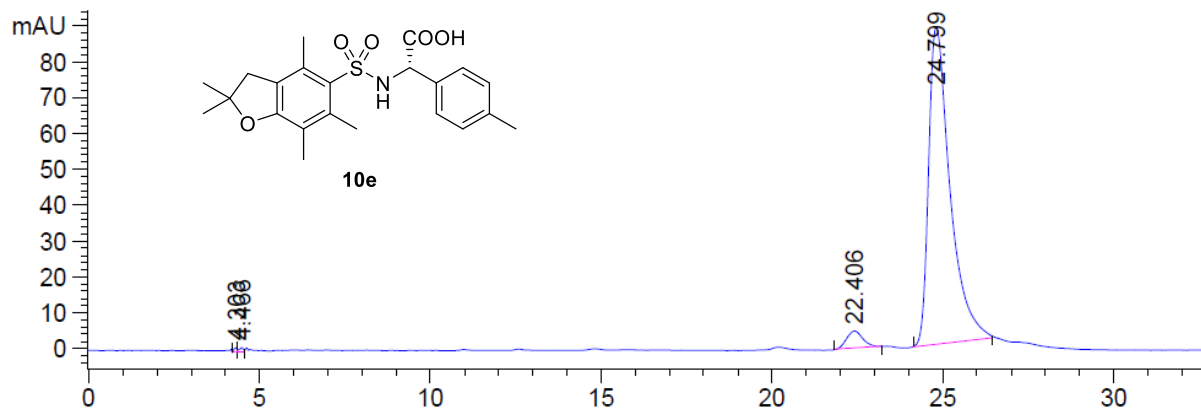

Signal 2: DAD1 B, Sig=254,16 Ref=380,100

| Peak # | RetTime [min] | Type | Width [min] | Area [mAU*s] | Height [mAU] | Area %  |
|--------|---------------|------|-------------|--------------|--------------|---------|
| 1      | 4.232         | BV   | 0.1646      | 118.84599    | 10.14943     | 0.4887  |
| 2      | 4.403         | VV   | 0.1452      | 113.20203    | 10.89388     | 0.4655  |
| 3      | 4.532         | VV   | 0.2362      | 165.12392    | 8.99320      | 0.6790  |
| 4      | 14.791        | BB   | 0.2280      | 17.13867     | 1.06362      | 0.0705  |
| 5      | 20.199        | BB   | 0.4332      | 199.94890    | 6.64255      | 0.8221  |
| 6      | 22.405        | BB   | 0.5502      | 965.18524    | 26.54658     | 3.9686  |
| 7      | 24.798        | MM   | 0.8031      | 2.27409e4    | 471.92319    | 93.5057 |

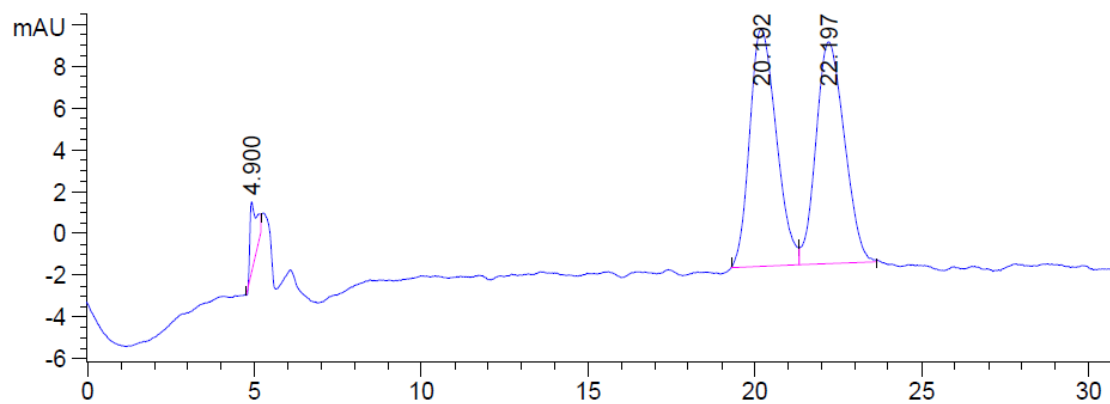

Signal 2: DAD1 B, Sig=254,16 Ref=380,100

| Peak # | RetTime [min] | Type | Width [min] | Area [mAU*s] | Height [mAU] | Area %  |
|--------|---------------|------|-------------|--------------|--------------|---------|
| 1      | 4.900         | BB   | 0.1789      | 44.67887     | 3.40936      | 3.4088  |
| 2      | 20.192        | BV   | 0.6723      | 633.50110    | 11.36460     | 48.3327 |
| 3      | 22.197        | VB   | 0.7197      | 632.53033    | 10.63719     | 48.2586 |

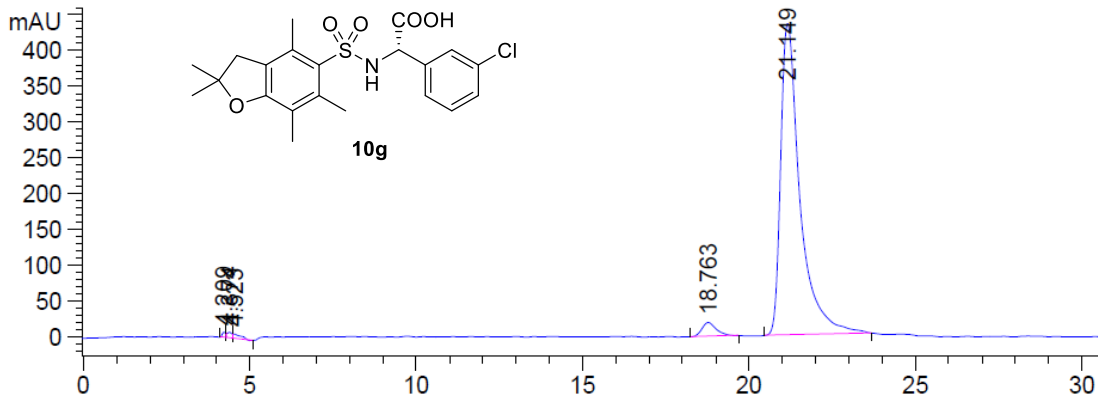

Signal 2: DAD1 B, Sig=254,16 Ref=380,100

| Peak # | RetTime [min] | Type | Width [min] | Area [mAU*s] | Height [mAU] | Area %  |
|--------|---------------|------|-------------|--------------|--------------|---------|
| 1      | 4.209         | BV   | 0.1244      | 57.63720     | 7.27653      | 0.3117  |
| 2      | 4.374         | VV   | 0.1421      | 81.93240     | 8.09693      | 0.4431  |
| 3      | 4.523         | VB   | 0.2099      | 103.18200    | 6.40591      | 0.5581  |
| 4      | 18.763        | BB   | 0.4527      | 607.88788    | 19.66129     | 3.2878  |
| 5      | 21.149        | BB   | 0.6005      | 1.76387e4    | 435.54517    | 95.3993 |

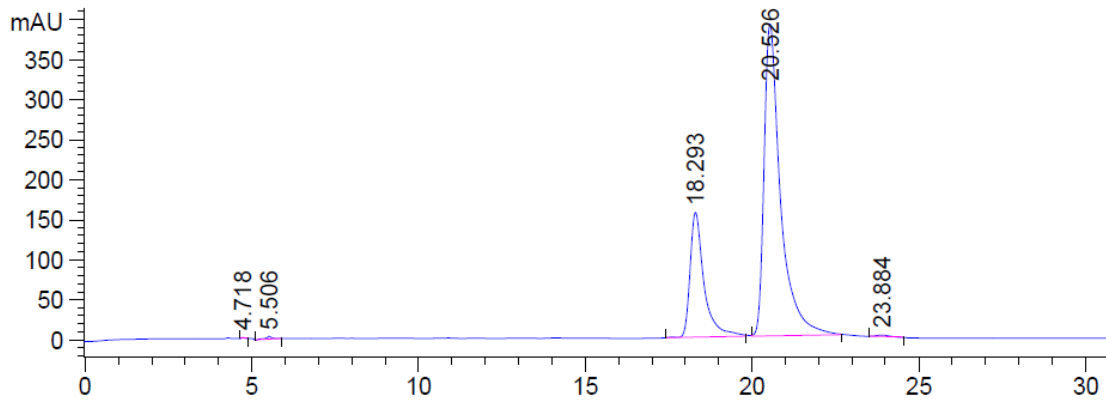

Signal 2: DAD1 B, Sig=254,16 Ref=380,100

| Peak # | RetTime [min] | Type | Width [min] | Area [mAU*s] | Height [mAU] | Area %  |
|--------|---------------|------|-------------|--------------|--------------|---------|
| 1      | 4.718         | BB   | 0.0927      | 9.25484      | 1.48470      | 0.0511  |
| 2      | 5.506         | BB   | 0.2204      | 69.81905     | 4.10569      | 0.3853  |
| 3      | 18.293        | BB   | 0.4310      | 4589.45166   | 156.08591    | 25.3302 |
| 4      | 20.526        | BB   | 0.5071      | 1.33879e4    | 389.38815    | 73.8906 |
| 5      | 23.884        | BB   | 0.3618      | 62.11916     | 2.07170      | 0.3428  |

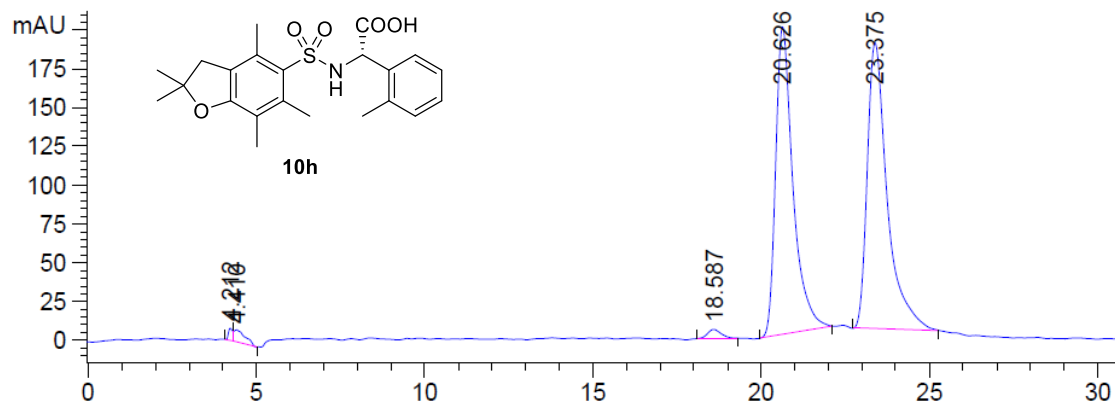

Signal 2: DAD1 B, Sig=254,16 Ref=380,100

| Peak # | RetTime [min] | Type | Width [min] | Area [mAU*s] | Height [mAU] | Area % | Peak # | RetTime [min] | Type | Width [min] | Area [mAU*s] | Height [mAU] | Area %  |
|--------|---------------|------|-------------|--------------|--------------|--------|--------|---------------|------|-------------|--------------|--------------|---------|
| 1      | 4.212         | BV   | 0.1383      | 74.45555     | 8.17406      | 0.4898 | 3      | 18.587        | BB   | 0.4087      | 161.91408    | 5.81760      | 1.0651  |
| 2      | 4.410         | VB   | 0.2830      | 188.11340    | 8.09794      | 1.2375 | 4      | 20.626        | BB   | 0.5399      | 7134.26709   | 198.22079    | 46.9318 |
|        |               |      |             |              |              |        | 5      | 23.375        | BB   | 0.6177      | 7642.60449   | 184.32230    | 50.2758 |

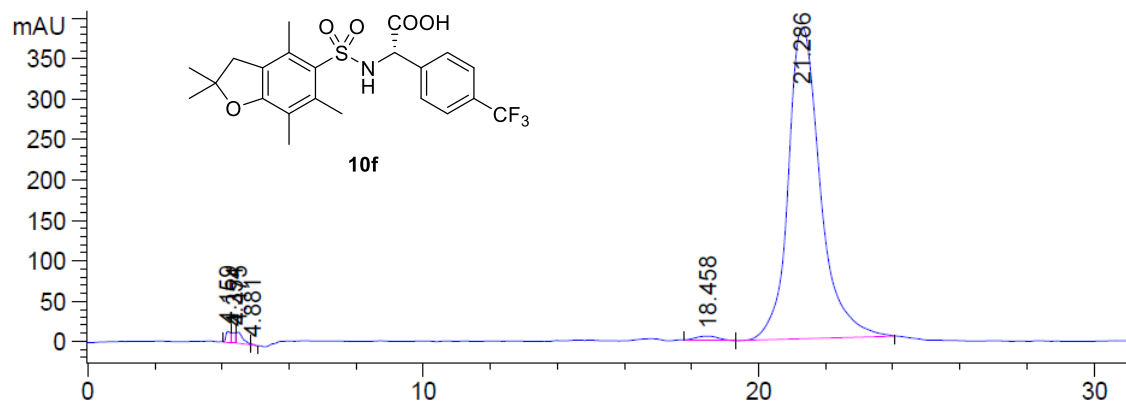

Signal 2: DAD1 B, Sig=254,16 Ref=380,100

| Peak # | RetTime [min] | Type | Width [min] | Area [mAU*s] | Height [mAU] | Area %  |
|--------|---------------|------|-------------|--------------|--------------|---------|
| 1      | 4.159         | BV   | 0.1515      | 140.75821    | 13.74558     | 0.5310  |
| 2      | 4.354         | VV   | 0.1154      | 101.30814    | 13.21413     | 0.3822  |
| 3      | 4.475         | VV   | 0.2041      | 201.56927    | 14.32734     | 0.7604  |
| 4      | 4.881         | VV   | 0.0858      | 9.75013      | 1.50088      | 0.0368  |
| 5      | 18.458        | BV   | 0.5898      | 284.43170    | 5.68395      | 1.0730  |
| 6      | 21.286        | VB   | 1.0267      | 2.57491e4    | 385.75967    | 97.1407 |
| 7      | 41.724        | BB   | 0.2556      | 20.08384     | 1.06715      | 0.0758  |

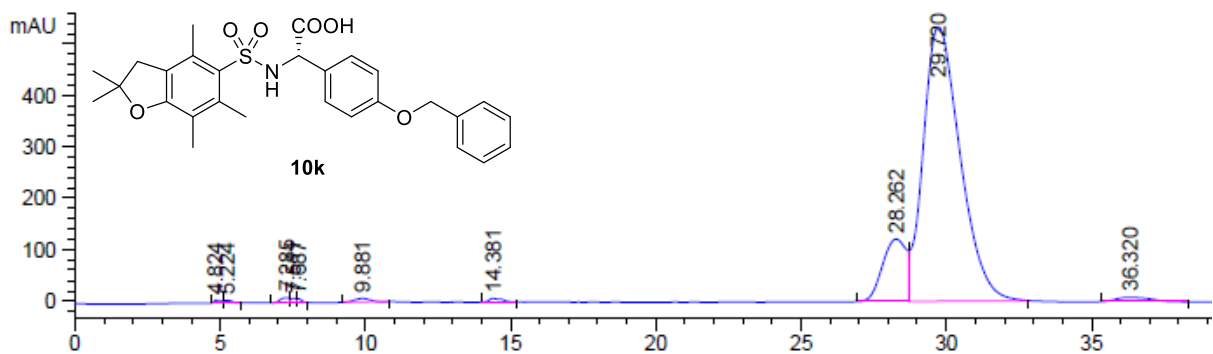

Signal 2: DAD1 B, Sig=254,16 Ref=380,100

| Peak # | RetTime [min] | Type | Width [min] | Area [mAU*s] | Height [mAU] | Area %  |
|--------|---------------|------|-------------|--------------|--------------|---------|
| 1      | 4.824         | BB   | 0.2130      | 88.30775     | 5.56865      | 0.1581  |
| 2      | 5.224         | BB   | 0.2407      | 87.76944     | 4.64068      | 0.1571  |
| 3      | 7.285         | BV   | 0.3117      | 217.32234    | 9.26257      | 0.3891  |
| 4      | 7.511         | VV   | 0.1506      | 88.38148     | 8.40727      | 0.1582  |
| 5      | 7.687         | VB   | 0.1715      | 83.58979     | 7.30491      | 0.1497  |
| 6      | 9.881         | BB   | 0.4947      | 257.87762    | 7.11827      | 0.4617  |
| 7      | 14.381        | BB   | 0.4149      | 219.94496    | 6.99290      | 0.3938  |
| 8      | 28.262        | BV   | 0.8583      | 6773.98291   | 121.15233    | 12.1277 |
| 9      | 29.720        | VB   | 1.3142      | 4.73185e4    | 532.78607    | 84.7158 |
| 10     | 36.320        | BB   | 0.9930      | 719.92389    | 8.61431      | 1.2889  |

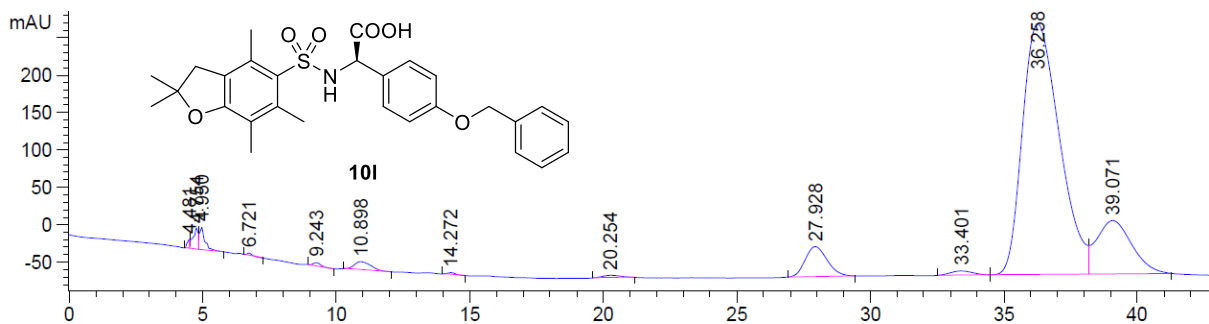

Signal 2: DAD1 B, Sig=254,16 Ref=380,100

| Peak # | RetTime [min] | Type | Width [min] | Area [mAU*s] | Height [mAU] | Area %  |
|--------|---------------|------|-------------|--------------|--------------|---------|
| 1      | 4.481         | BV   | 0.1040      | 89.46231     | 11.86282     | 0.1917  |
| 2      | 4.754         | VV   | 0.1757      | 365.67953    | 28.12002     | 0.7836  |
| 3      | 4.950         | VB   | 0.1855      | 416.09567    | 29.68783     | 0.8916  |
| 4      | 6.721         | BB   | 0.1756      | 36.30733     | 3.12397      | 0.0778  |
| 5      | 9.243         | BB   | 0.2927      | 83.51518     | 4.41555      | 0.1790  |
| 6      | 10.898        | BB   | 0.5701      | 472.99051    | 10.77545     | 1.0135  |
| 7      | 14.272        | BB   | 0.2958      | 54.66651     | 2.61616      | 0.1171  |
| 8      | 20.254        | BB   | 0.6211      | 177.05392    | 3.45969      | 0.3794  |
| 9      | 27.928        | BB   | 0.8343      | 2313.87622   | 40.27053     | 4.9581  |
| 10     | 33.401        | BV   | 0.7178      | 339.25293    | 5.72094      | 0.7269  |
| 11     | 36.258        | VV   | 1.4817      | 3.24442e4    | 335.64297    | 69.5205 |
| 12     | 39.071        | VB   | 1.2795      | 6628.05469   | 71.76246     | 14.2024 |
| 13     | 48.092        | BBA  | 1.1009      | 3247.39893   | 41.05018     | 6.9584  |

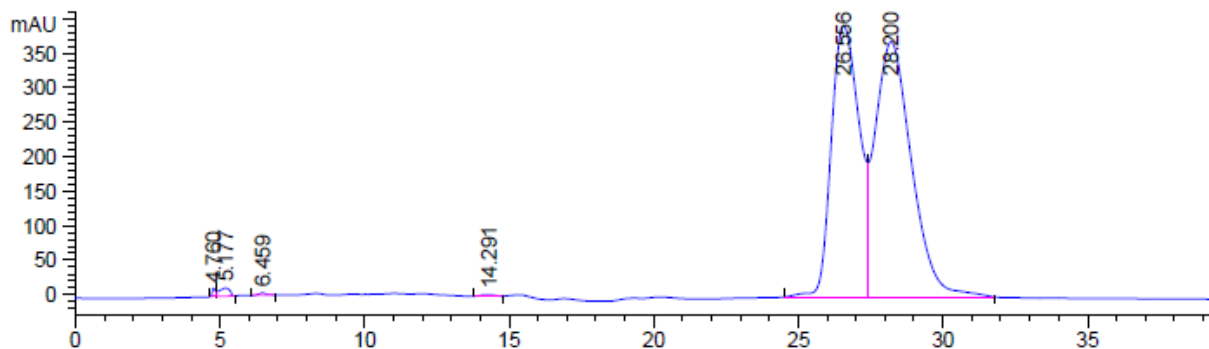

| Peak # | RetTime [min] | Type | Width [min] | Area [mAU*s] | Height [mAU] | Area %  |
|--------|---------------|------|-------------|--------------|--------------|---------|
| 1      | 4.760         | BV   | 0.1227      | 104.16186    | 12.31539     | 0.1747  |
| 2      | 5.177         | VV   | 0.3398      | 295.68472    | 11.98631     | 0.4959  |
| 3      | 6.459         | BB   | 0.2743      | 72.27960     | 3.66121      | 0.1212  |
| 4      | 14.291        | BV   | 0.4050      | 66.03365     | 2.01140      | 0.1108  |
| 5      | 26.556        | BV   | 1.0474      | 2.64803e4    | 394.34619    | 44.4150 |
| 6      | 28.200        | VB   | 1.2837      | 3.26017e4    | 370.83386    | 54.6824 |



## 4 NMR data

### <sup>1</sup>H NMR 10a

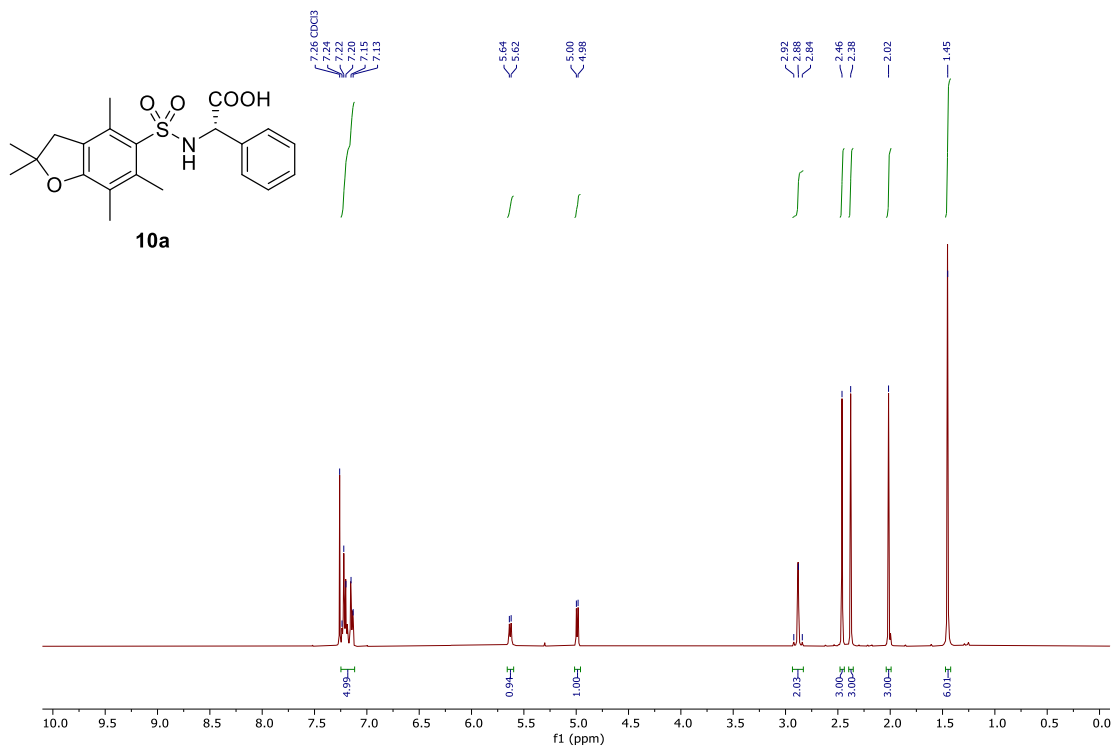

### <sup>13</sup>C NMR 10a

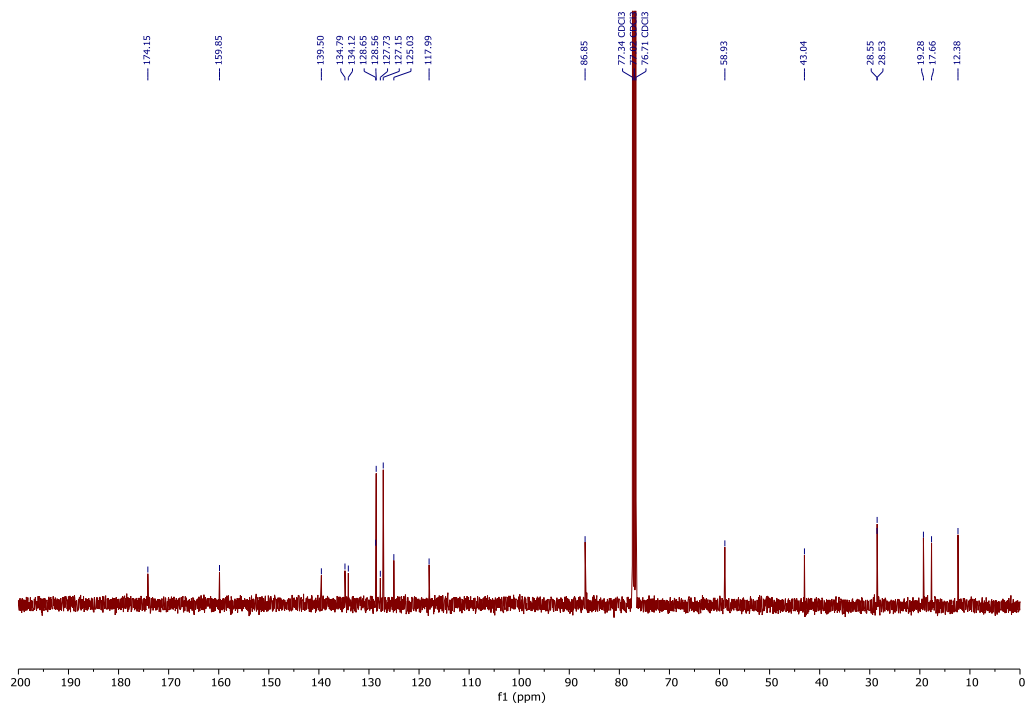

# <sup>1</sup>H NMR 10b

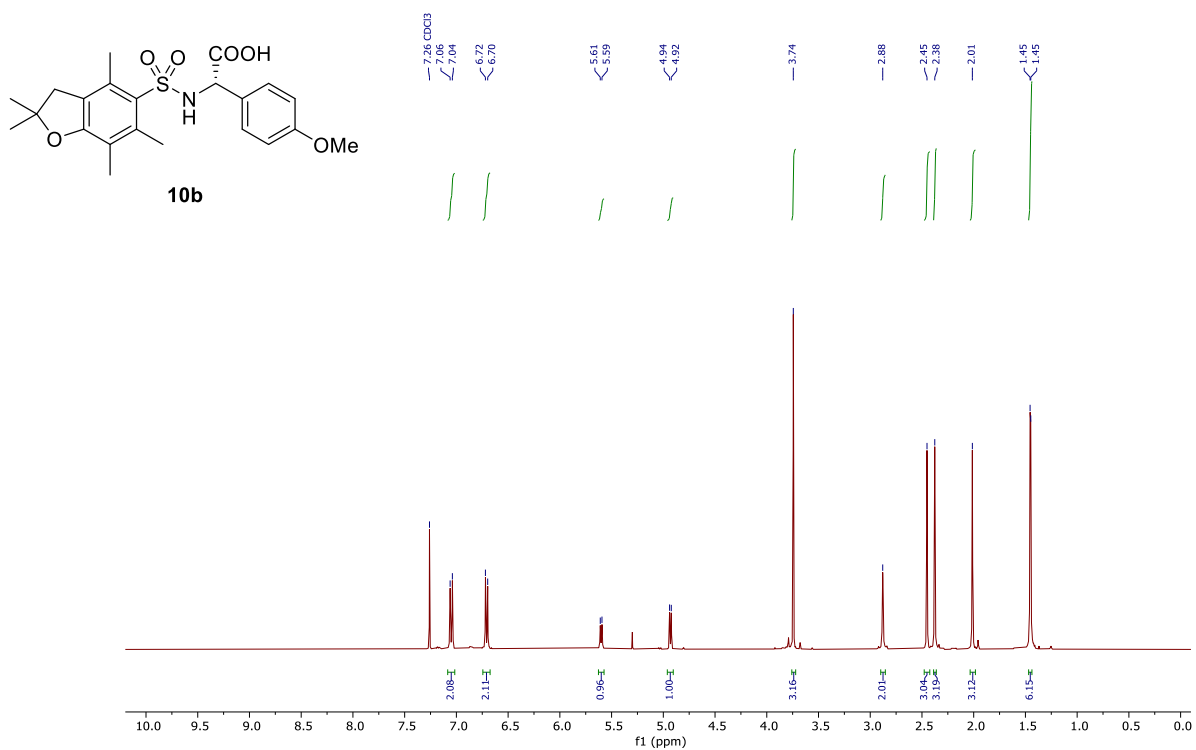

# <sup>13</sup>C NMR 10b

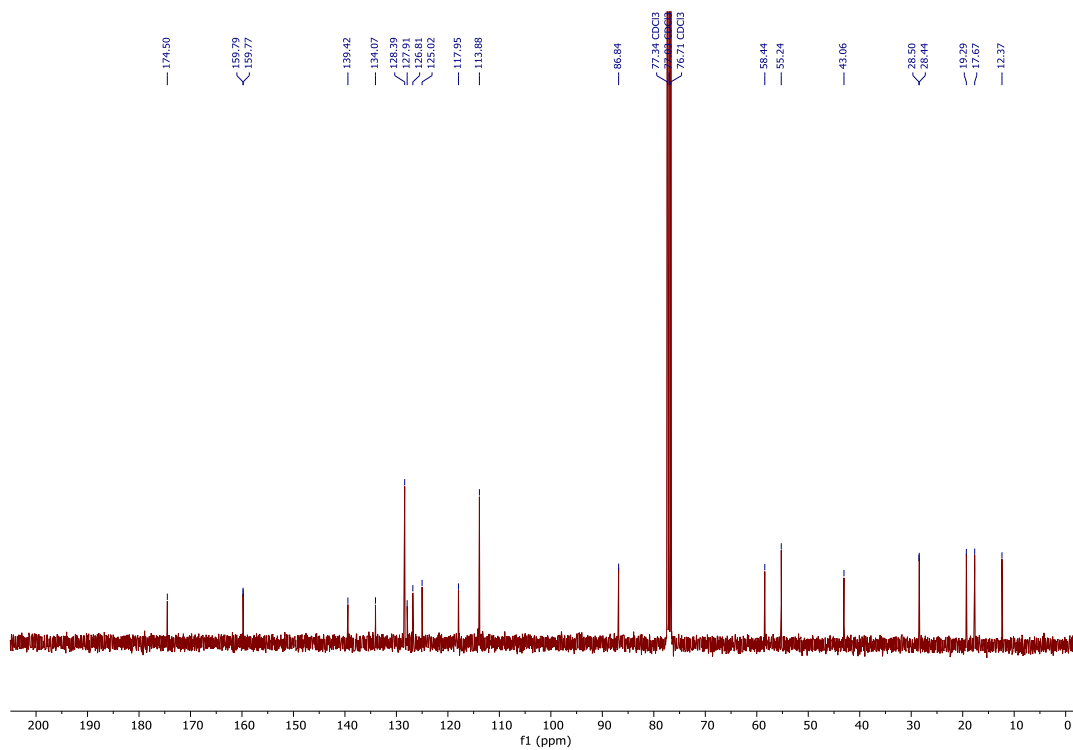

# <sup>1</sup>H NMR 10c

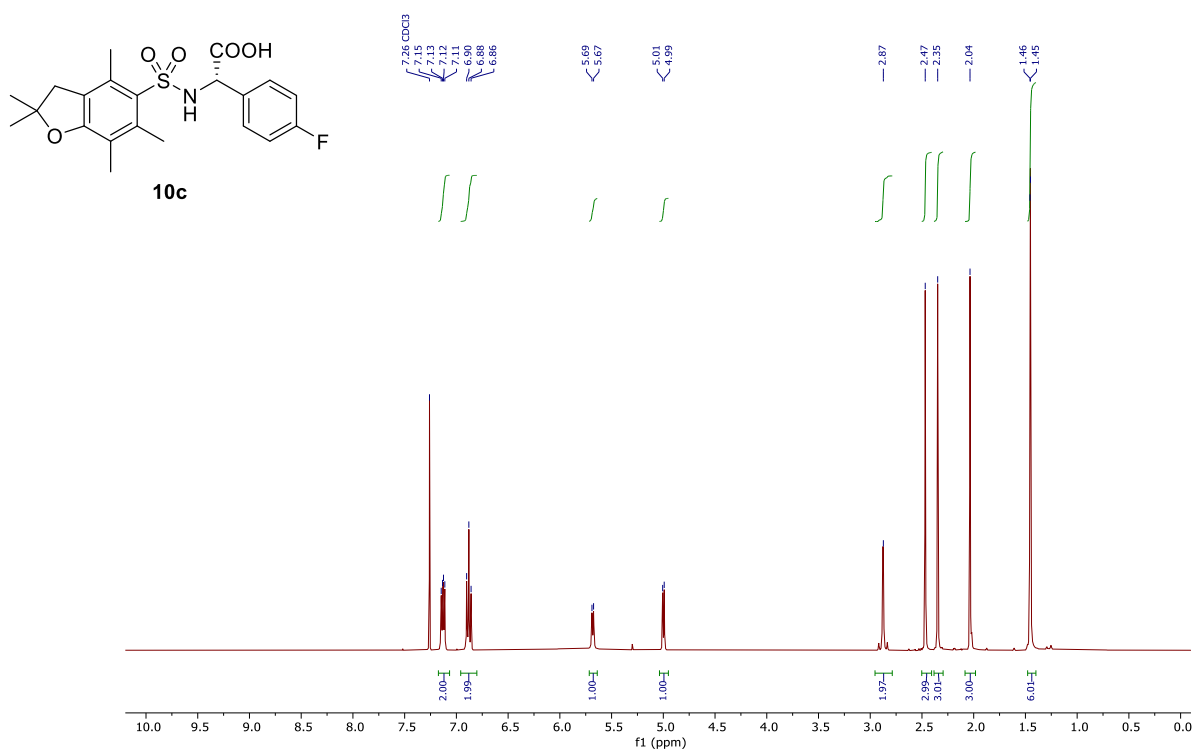

# <sup>13</sup>C NMR 10c

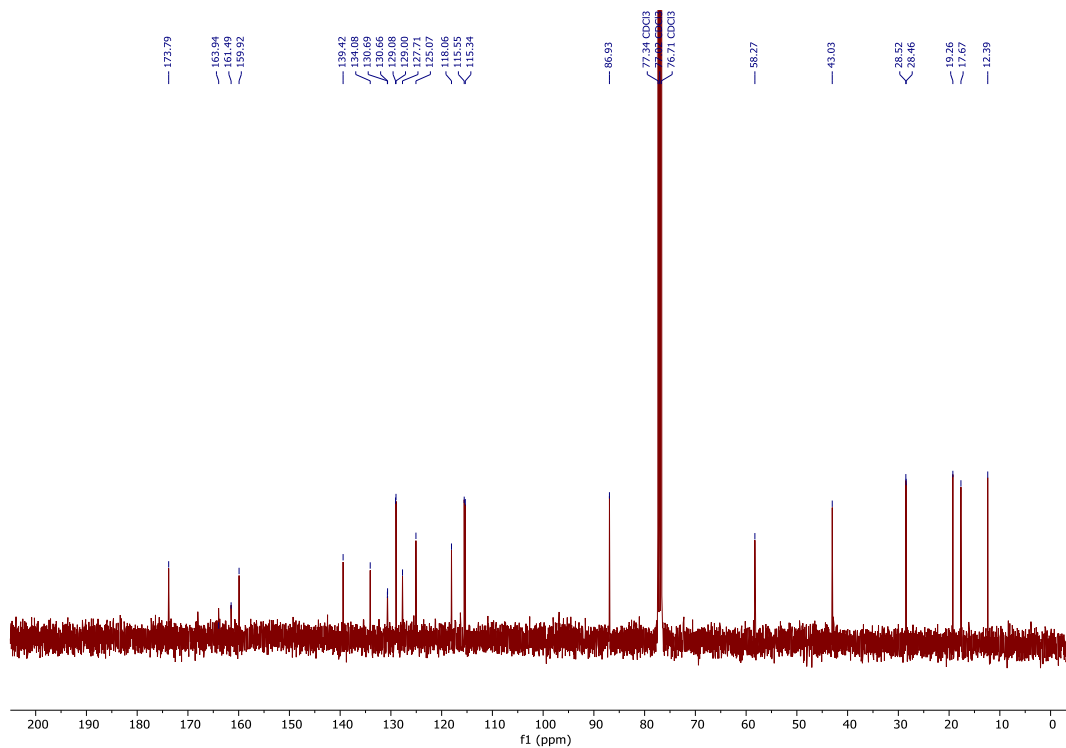

# <sup>19</sup>F NMR 10c

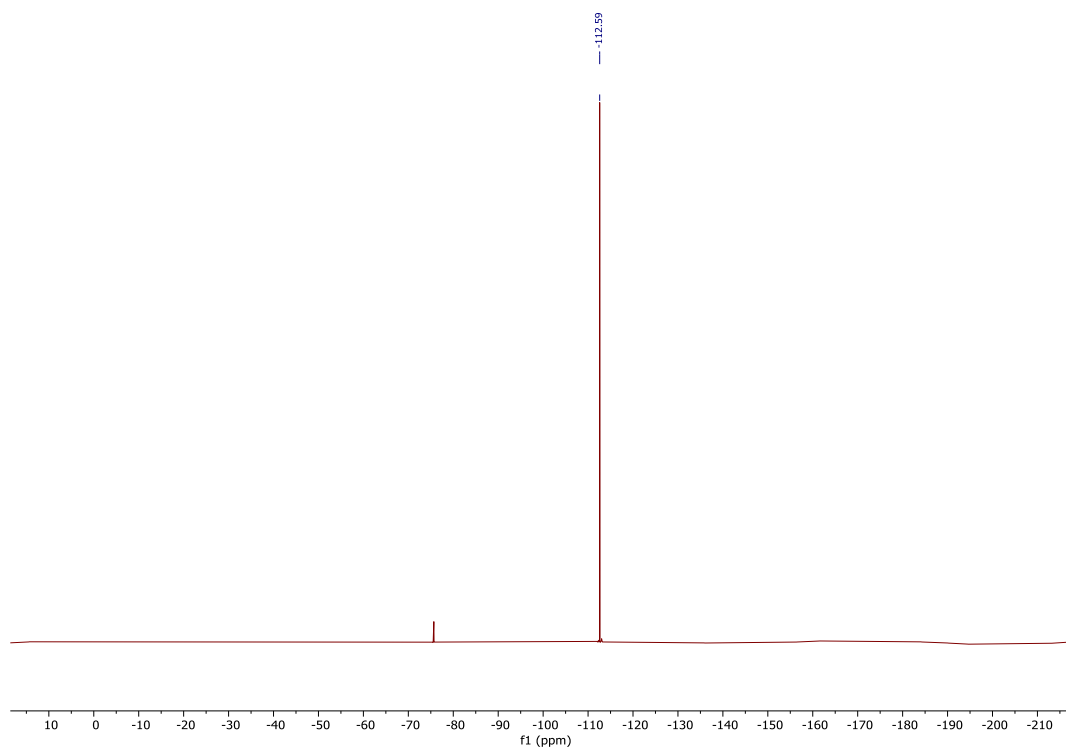

# <sup>1</sup>H NMR 10d

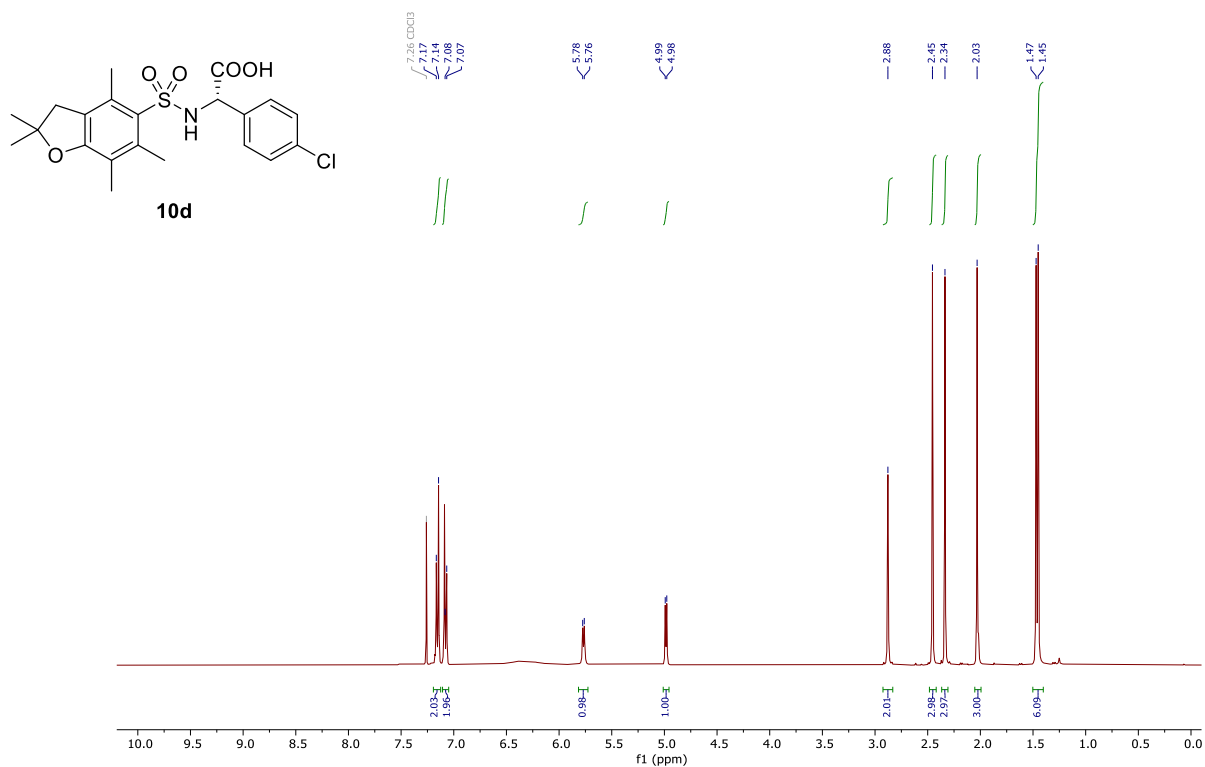

# <sup>13</sup>C NMR 10d

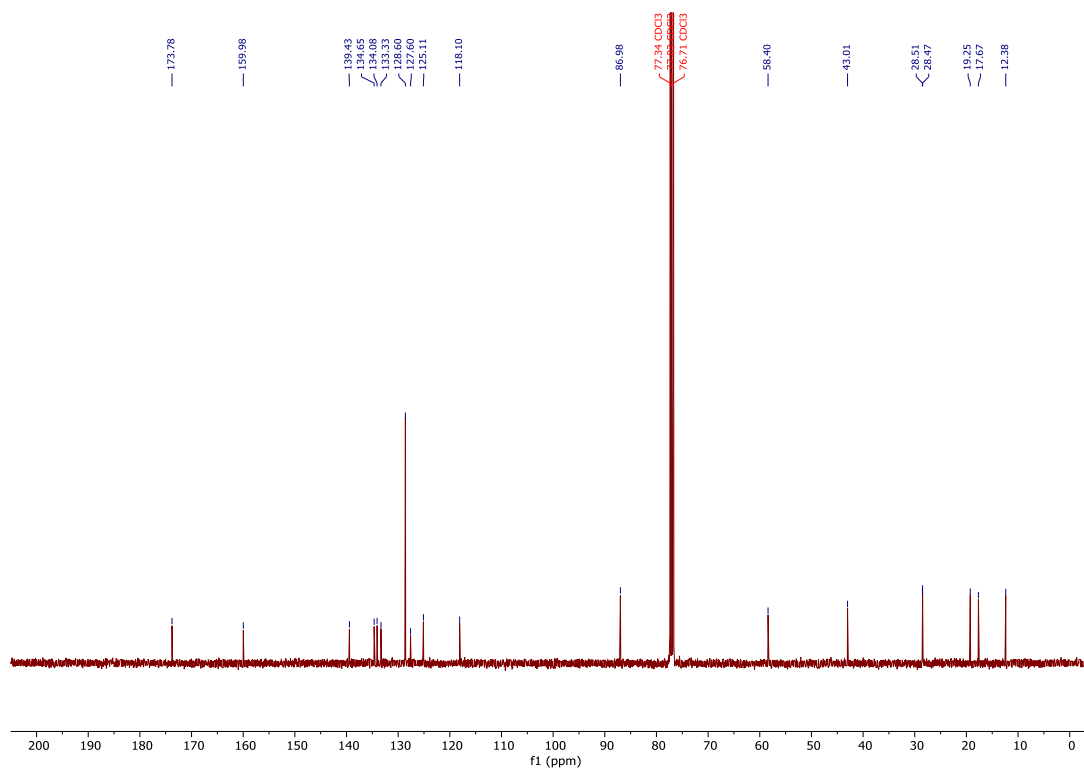

# <sup>1</sup>H NMR 10e

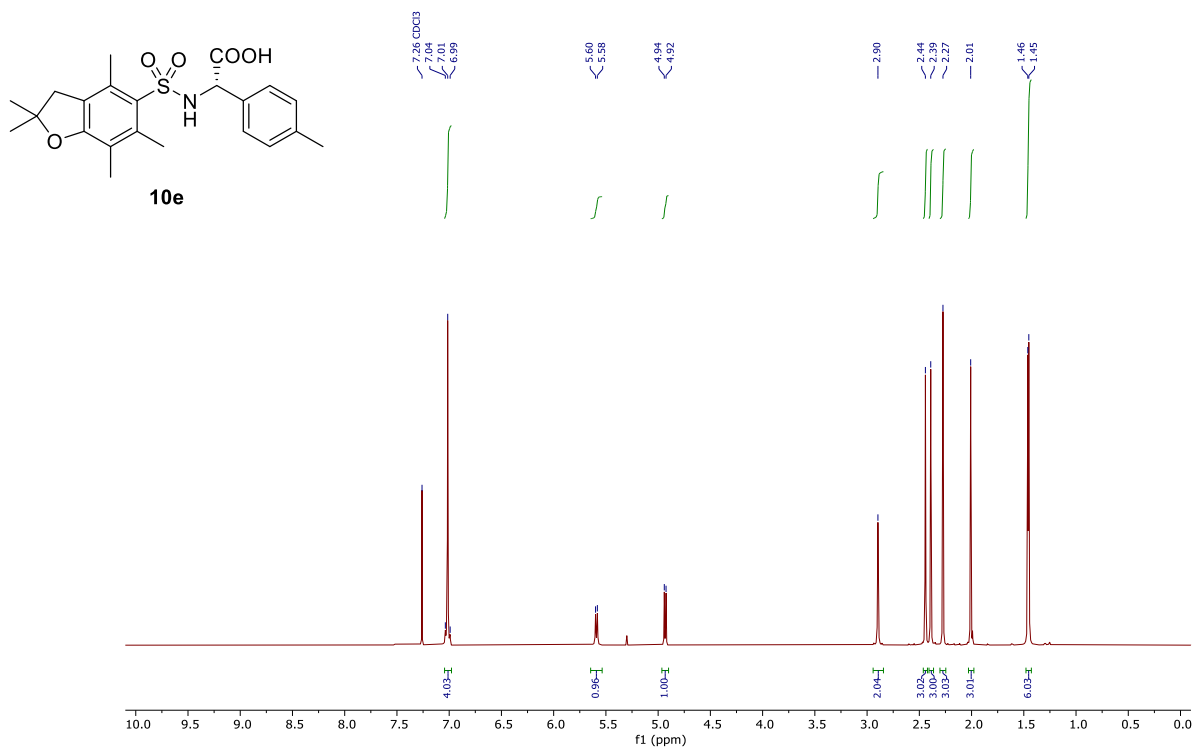

### <sup>13</sup>C NMR 10e

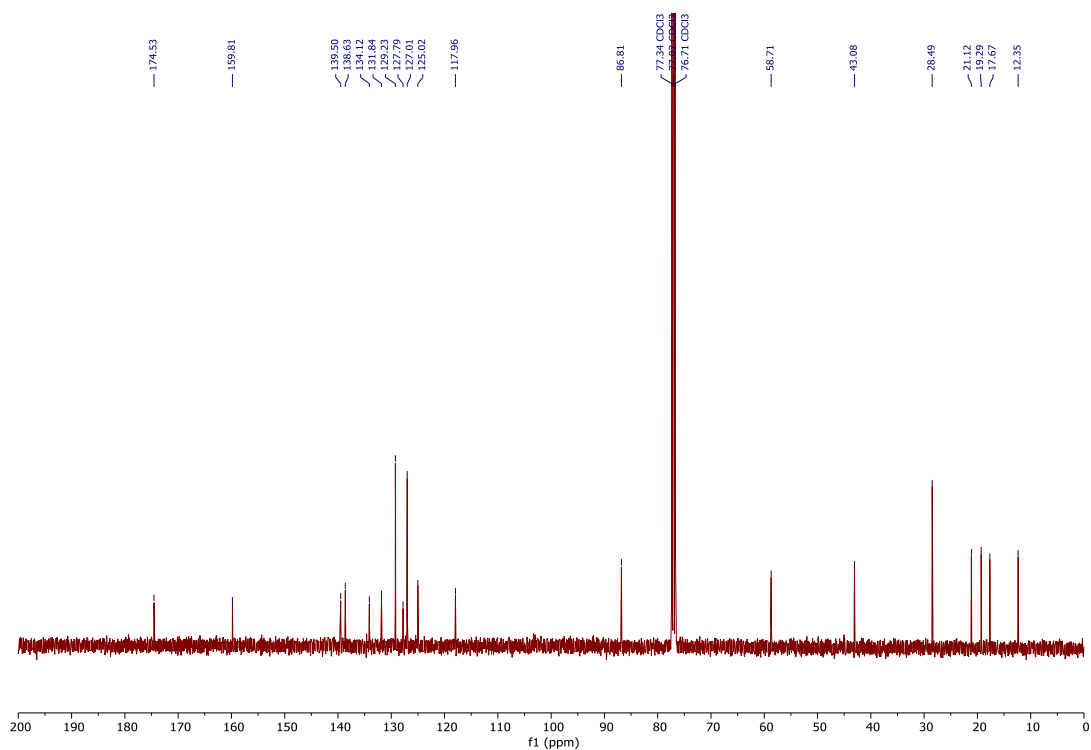

### <sup>1</sup>H NMR 10f

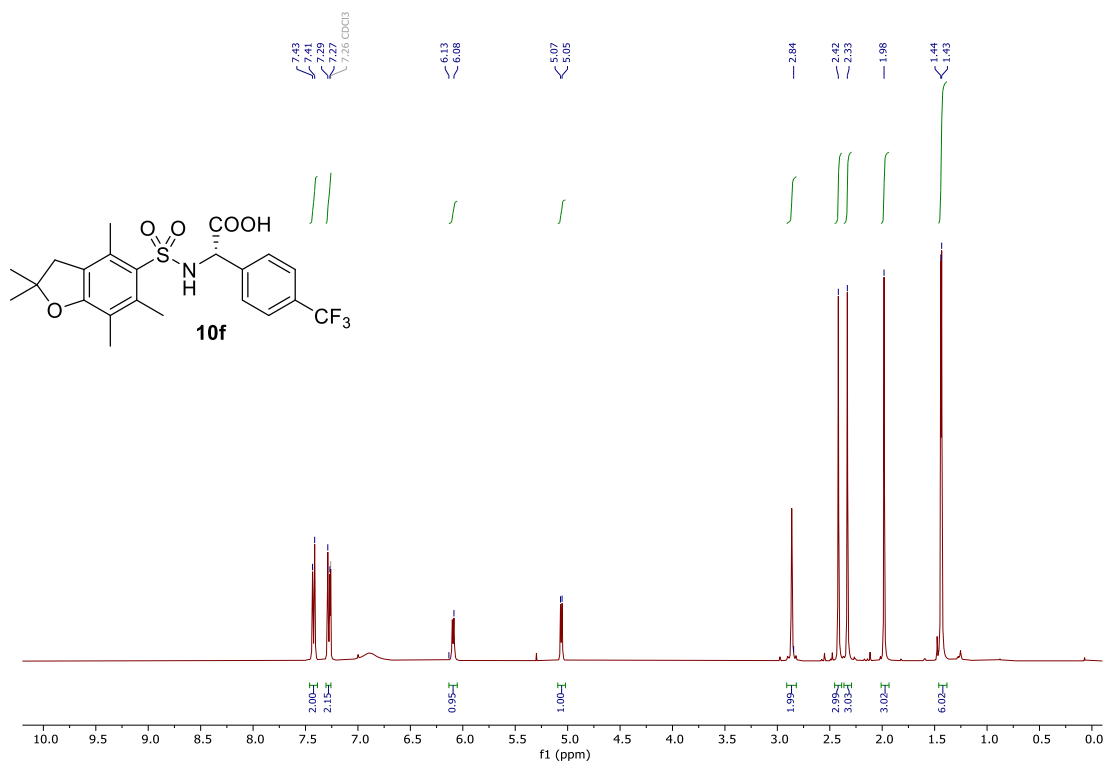

# <sup>13</sup>C NMR 10f

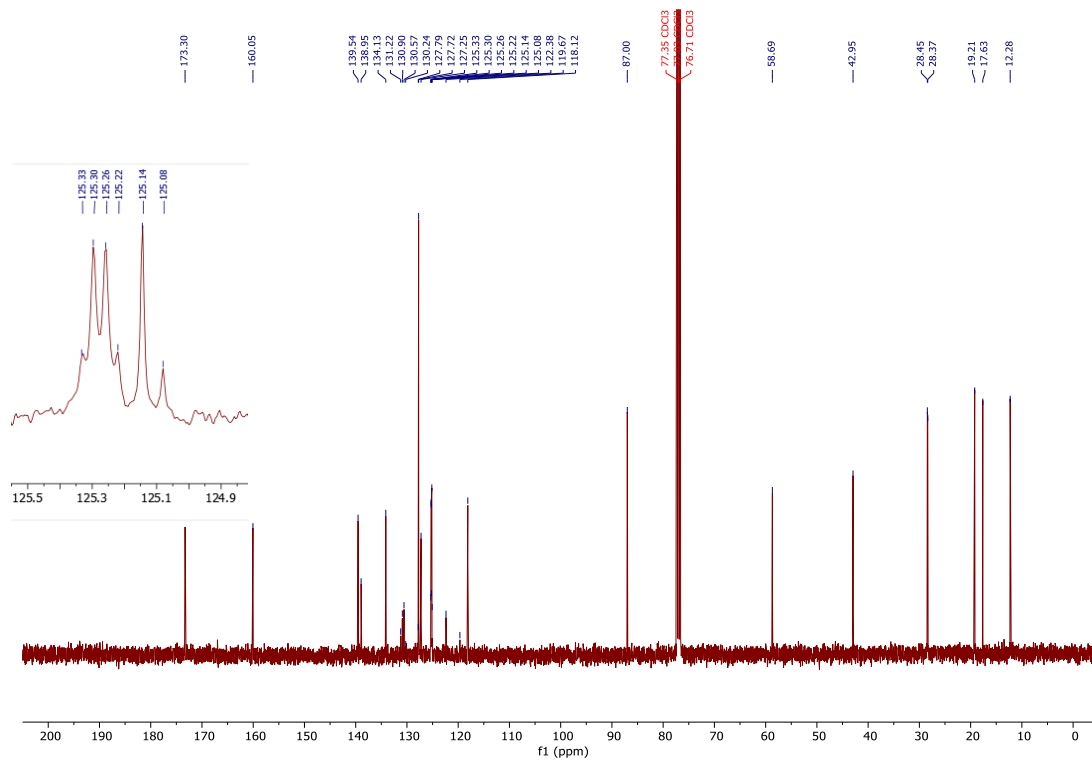

# <sup>19</sup>F NMR 10f

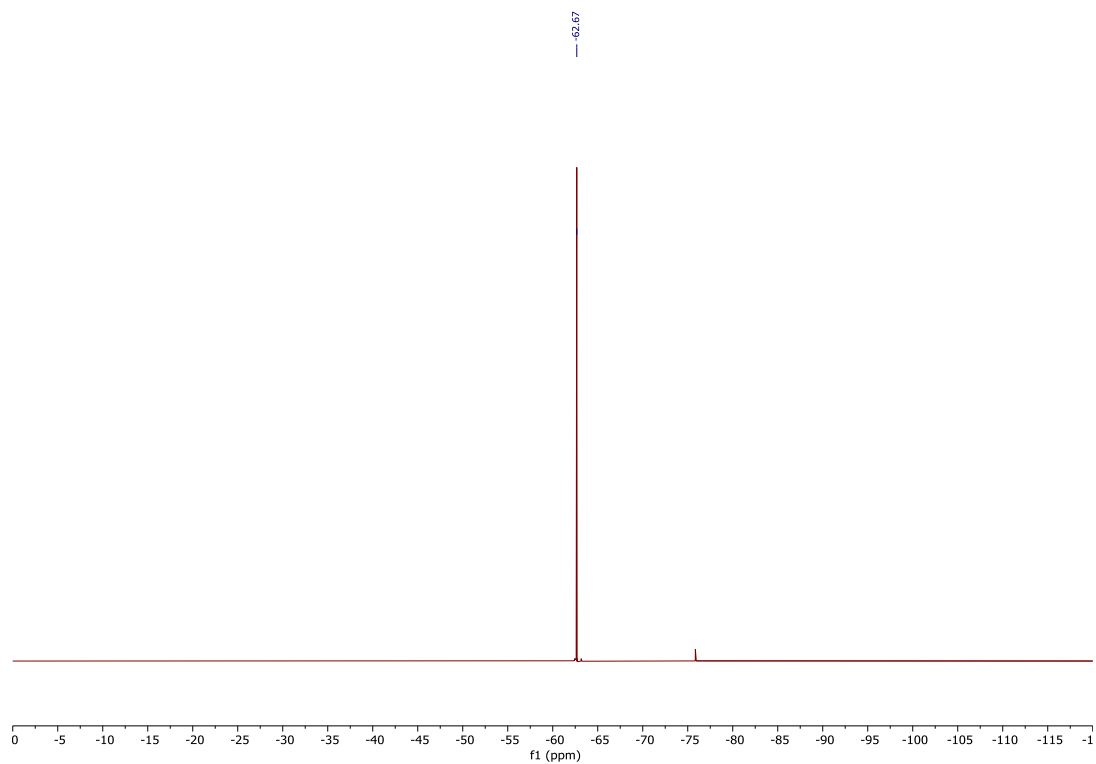

# <sup>1</sup>H NMR 10g

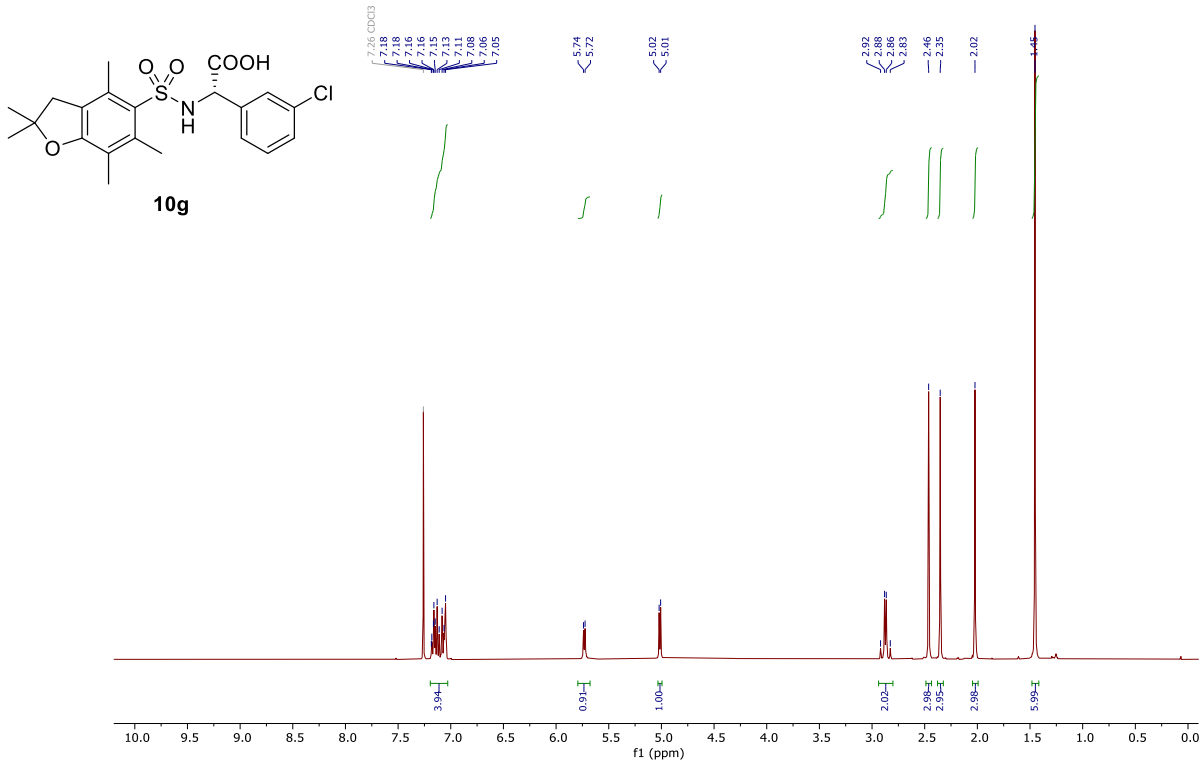

# <sup>13</sup>C NMR 10g

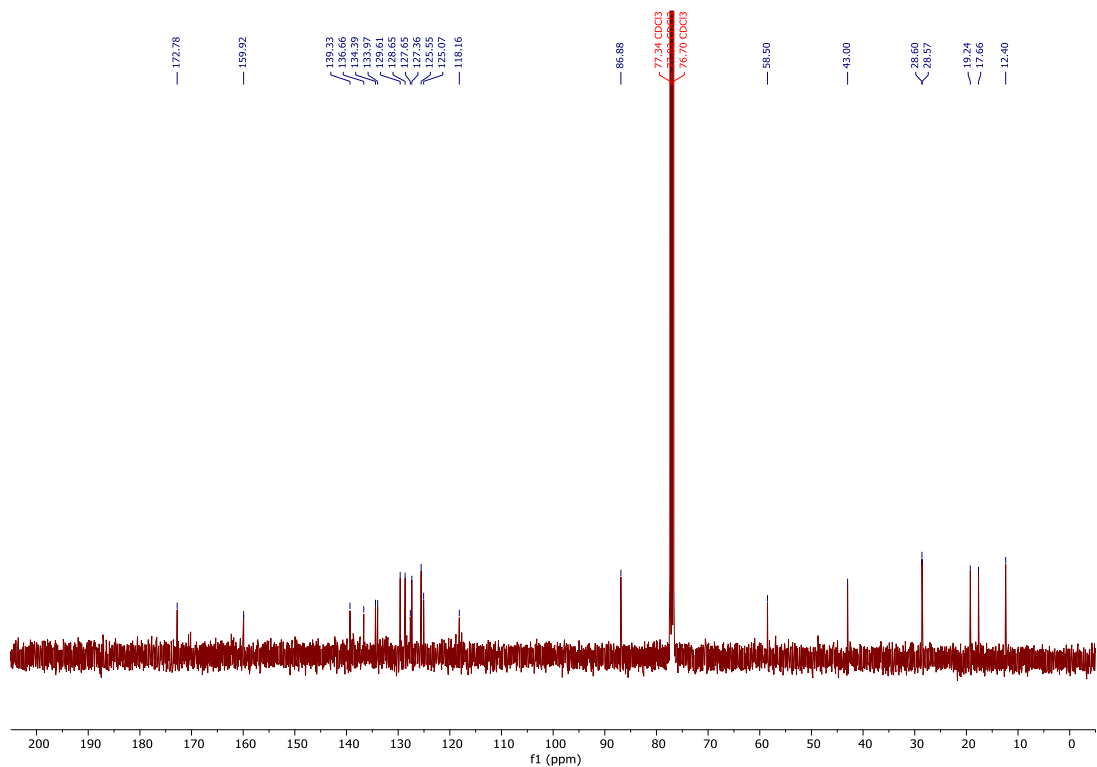



# <sup>1</sup>H NMR 10h

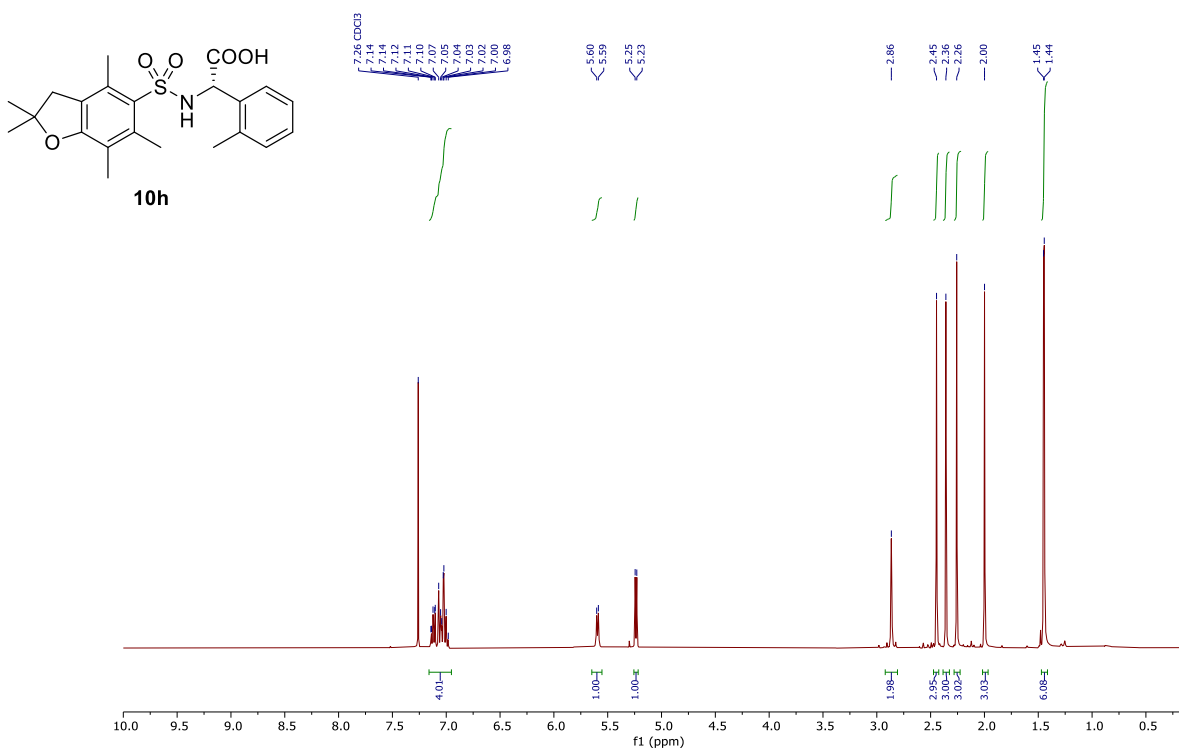

# <sup>13</sup>C NMR 10h

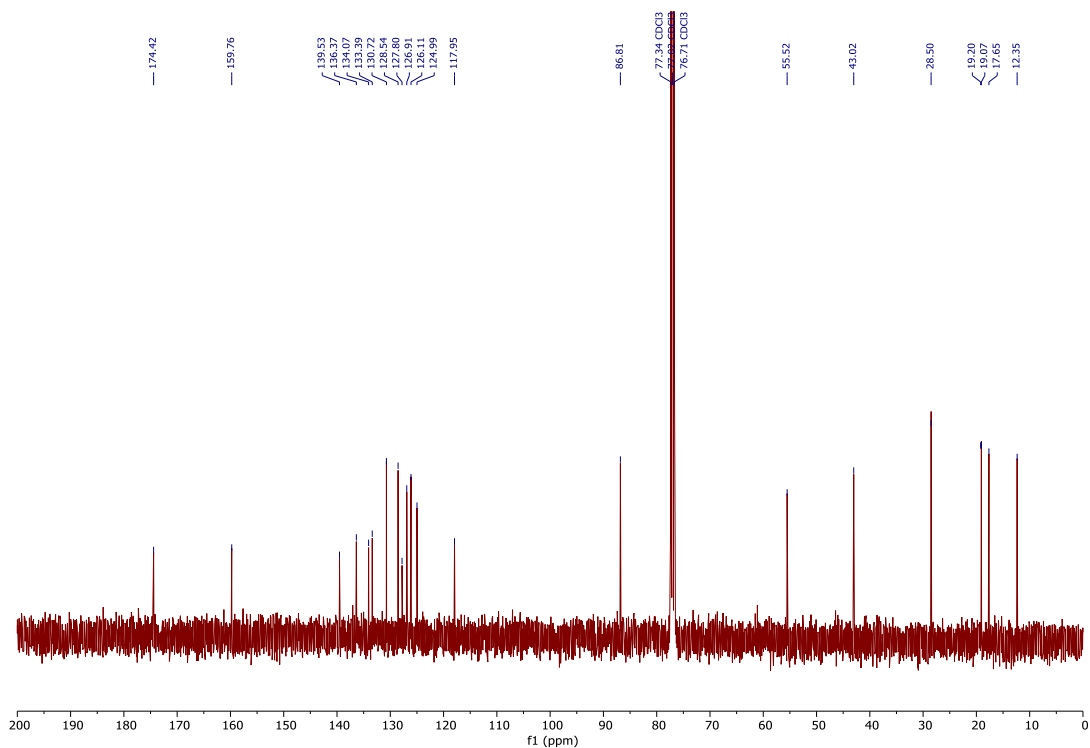

# <sup>1</sup>H NMR 10k

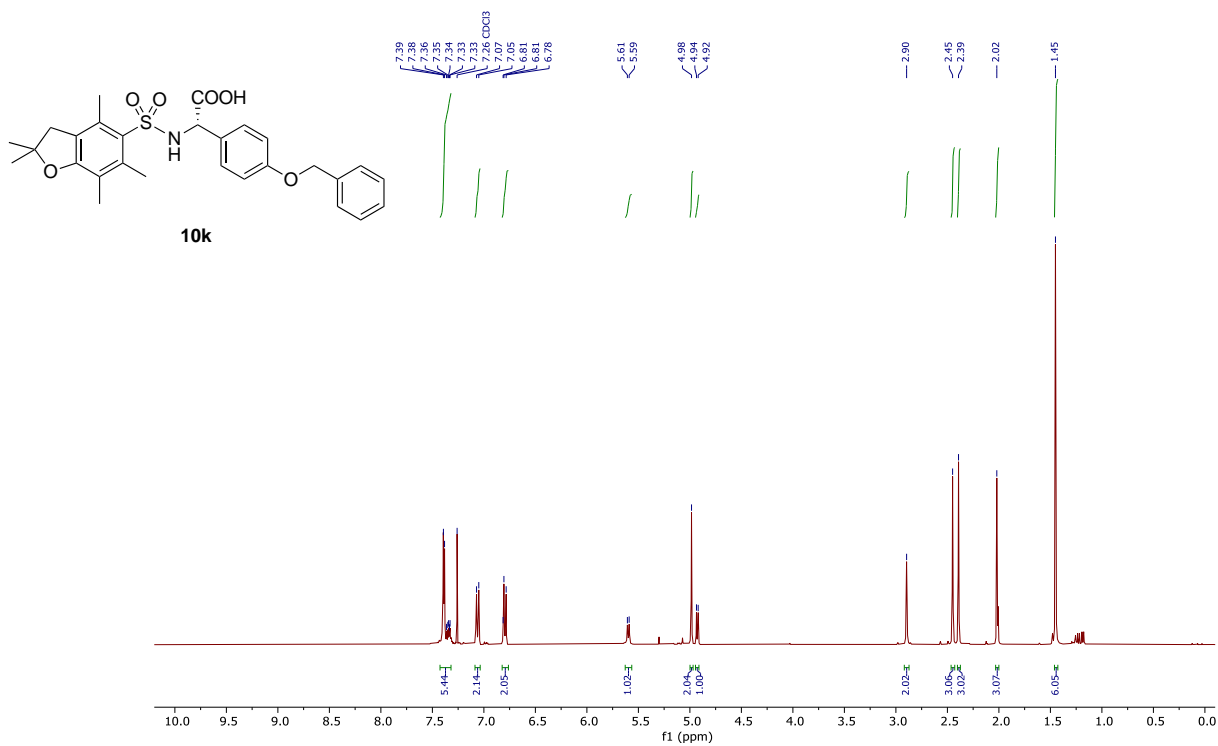

# <sup>13</sup>C NMR 10k

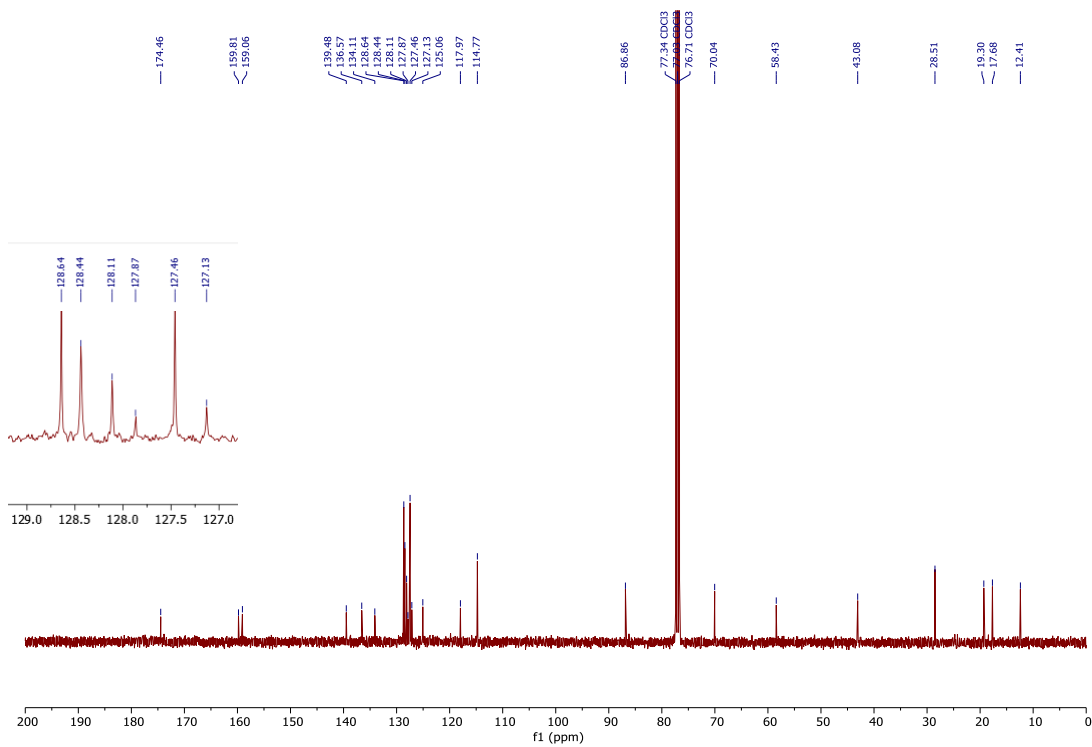

## <sup>1</sup>H NMR 101

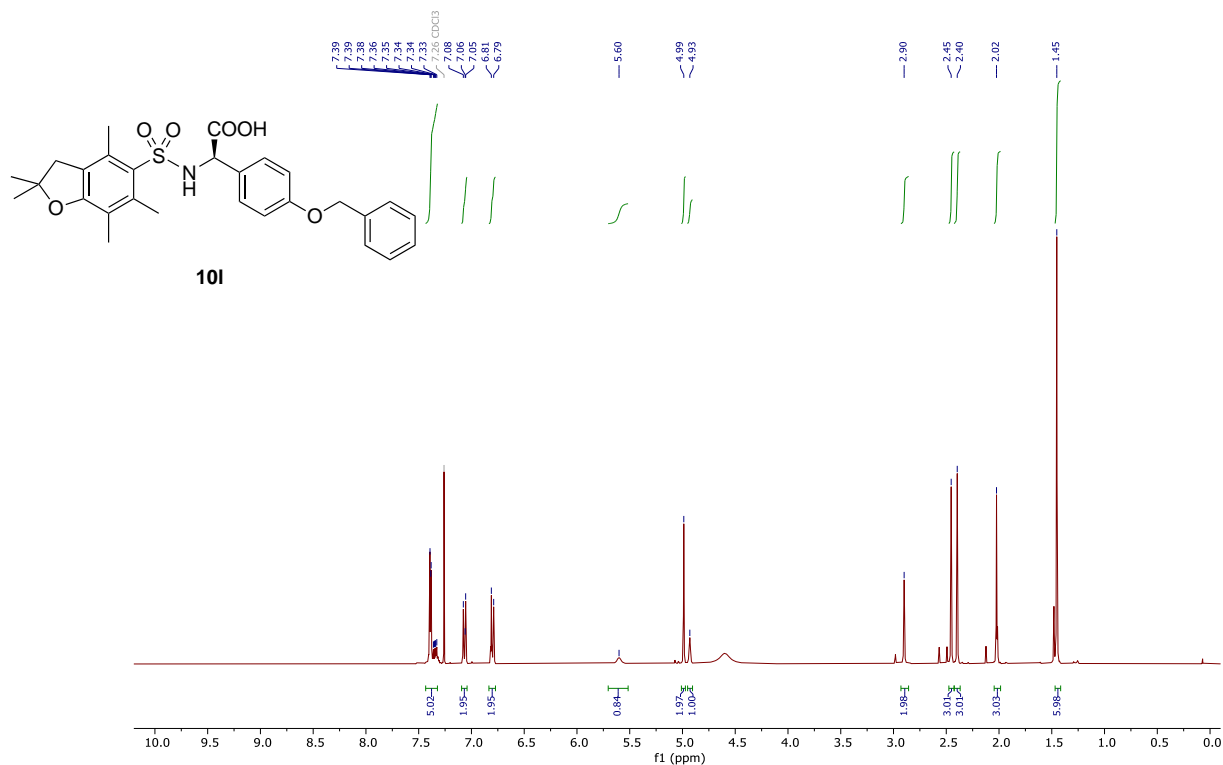

## 5 References

- [1] Carpino, L. A., Shroff, H., Triolo, S. A., Mansour, E.-S. M. E., Wenschuh, H. and Albericio, F. *Tetrahedron Letters*, **1993**, 34, 7829-7832. [https://doi.org/10.1016/S0040-4039\(00\)61487-9](https://doi.org/10.1016/S0040-4039(00)61487-9)
- [2] Denmark, S. E., Stavenger, R. A., Faucher, A.-M., and Edwards, J. P. *The Journal of Organic Chemistry*, **1997**, 62, 3375-3389. <https://doi.org/10.1021/jo970044z>
- [3] Lennox, A. J. J. *Organotrifluoroborate Preparation. In: Organotrifluoroborate Preparation, Coupling and Hydrolysis*, **2013**, Springer Theses, Springer International Publishing Switzerland. [https://doi.org/10.1007/978-3-319-01134-9\\_2](https://doi.org/10.1007/978-3-319-01134-9_2)
- [4] Jakob, B., Diehl, A.M., Horst, K., Kelm, H. and Manolikakes, G. *Frontiers in Chemistry*, **2023**, 11:1165618. <https://doi.org/10.3389/fchem.2023.1165618>
